# Supplementary material
Source: PubMed Central journal article supplement (PMC3816427)

## SI APPENDIX

A quorum-sensing inhibitor blocks *Pseudomonas aeruginosa* virulence and biofilm formation

Colleen T. O'Loughlin<sup>1</sup>, Laura C. Miller<sup>2</sup>, Albert Siryaporn<sup>1</sup>, Knut Drescher<sup>1,3</sup>, Martin F. Semmelhack<sup>2</sup>, Bonnie L. Bassler<sup>1,4\*</sup>

### Affiliations:

<sup>1</sup>Department of Molecular Biology, Princeton University, Princeton, NJ 08544

<sup>2</sup>Department of Chemistry, Princeton University, Princeton, NJ 08544

<sup>3</sup>Department of Mechanical and Aerospace Engineering, Princeton University, Princeton, NJ 08544

<sup>4</sup>Howard Hughes Medical Institute, Chevy Chase, MD 20815

\*Corresponding Author

Correspondence should be addressed to Bonnie L. Bassler.

Telephone: (609) 258-2857

Fax: (609) 258-2957

Email: [bbassler@princeton.edu](mailto:bbassler@princeton.edu)

## **Table of Contents**

### **Supplemental Figures**

Fig. S1

Fig. S2

Fig. S3

Fig. S4

Fig. S5

Fig. S6

Fig. S7

### **Supplemental Tables**

Table S1

Table S2

Table S3

Table S4

Table S5

Table S6

Table S7

### **Supplemental Methods**

Strain Construction

LasR/RhIR Overexpression

Biofilm Clogging of Microfluidic Chambers

Chemical Synthesis

### **Supplemental Chemical Characterization**

<sup>1</sup>H NMR Spectra

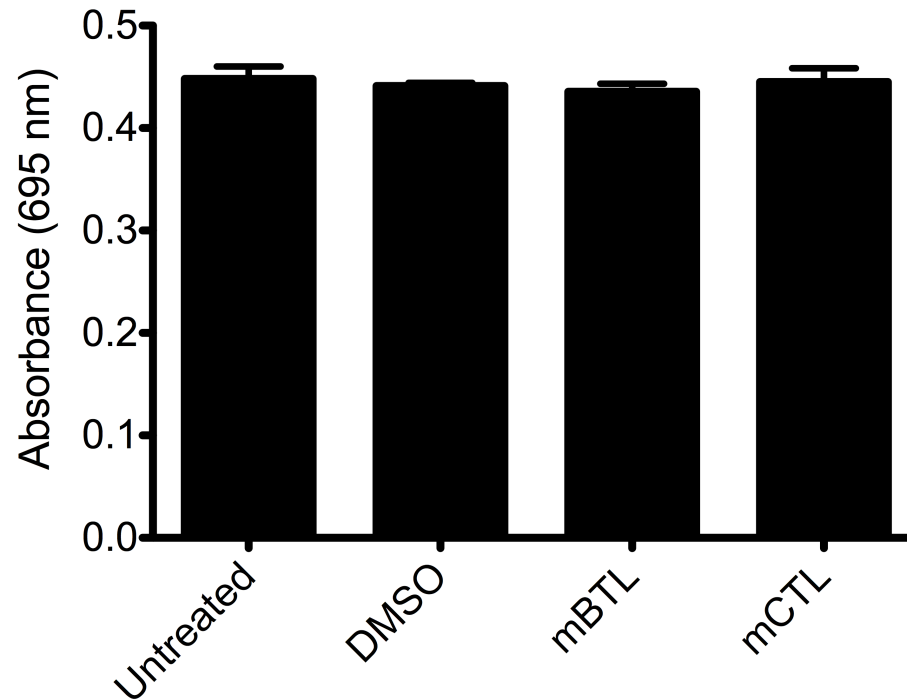

**Fig. S1: Treatment of cell-free culture fluids with mBTL or mCTL does not alter pyocyanin levels**

Cell-free culture fluids from WT *P. aeruginosa* PA14 following 17 hr growth were left untreated or supplied with 100  $\mu$ M mCTL, mBTL, or an equivalent amount of DMSO. Subsequently, the fluids were incubated shaking at 37°C for 17 hr. Pyocyanin levels were assessed by absorption. Error bars indicate S.D. of three replicates.

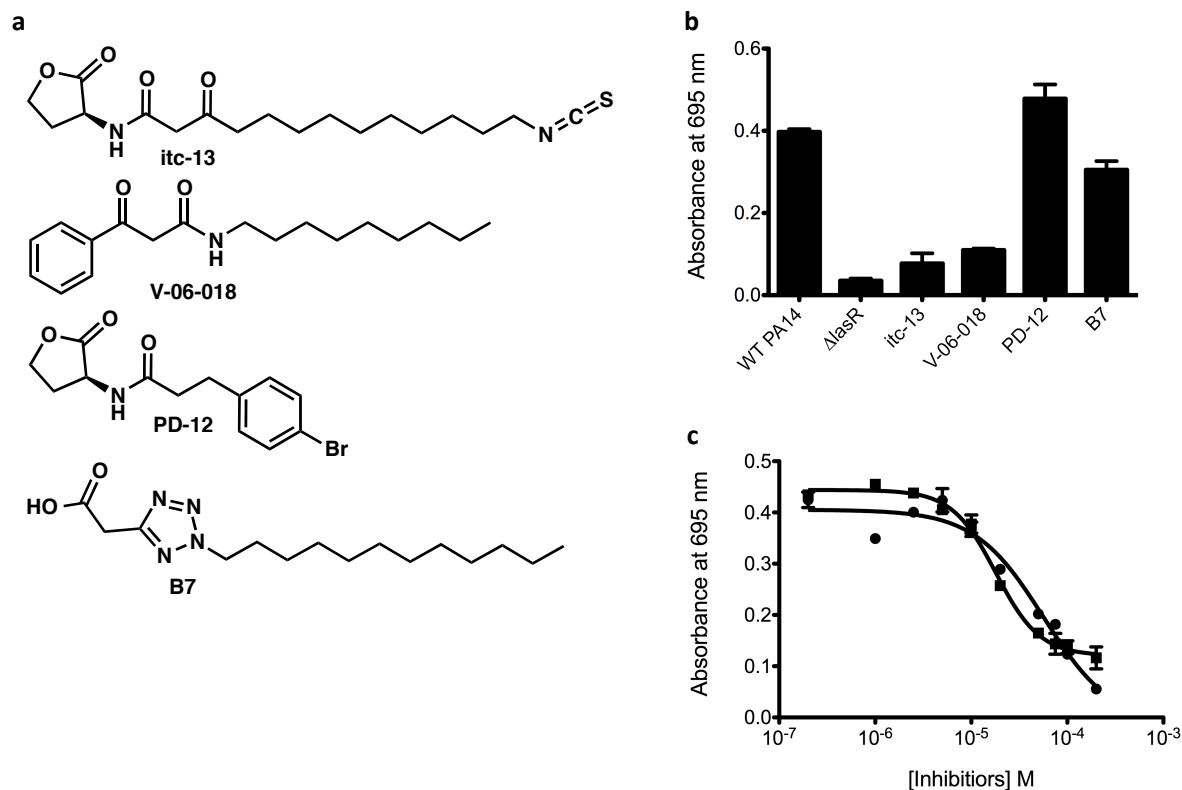

**Fig. S2: Inhibition of pyocyanin production in *P. aeruginosa* PA14 by previously reported LasR inhibitors**

**a.** Structures of four previously published LasR inhibitors (1-3). **b.** Pyocyanin inhibition assays were performed with 100  $\mu$ M of each of the four molecules in panel a. on WT *P. aeruginosa* PA14. **c.** Pyocyanin inhibition titration assays were performed with itc-13 (circles) and V-06-018 (squares) at the concentrations shown using WT *P. aeruginosa* PA14. Error bars represent S.D. of three replicates.

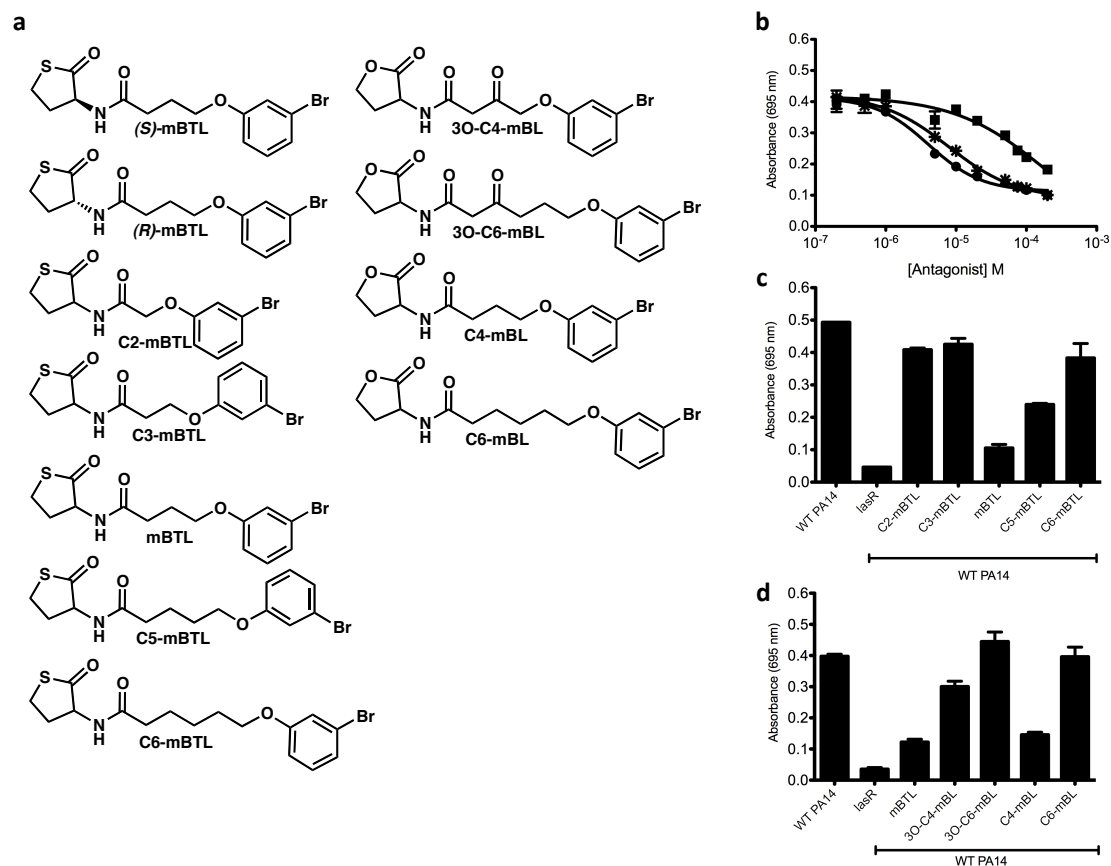

**Fig. S3: Structure-function analysis of mBTL and closely related derivatives**

**a.** Structures of mBTL and derivatives tested for inhibition of pyocyanin production. **b.** Pyocyanin inhibition titrations were performed with the (*R*) (squares) and (*S*) (circles) enantiomers of mBTL and the racemic mixture (asterisks). **c.** mBTL derivatives containing 2-6 carbon chains were tested at 100  $\mu$ M. **d.** Lactone variants were examined at 100  $\mu$ M. In all panels, error bars indicate S.D. of three replicates.

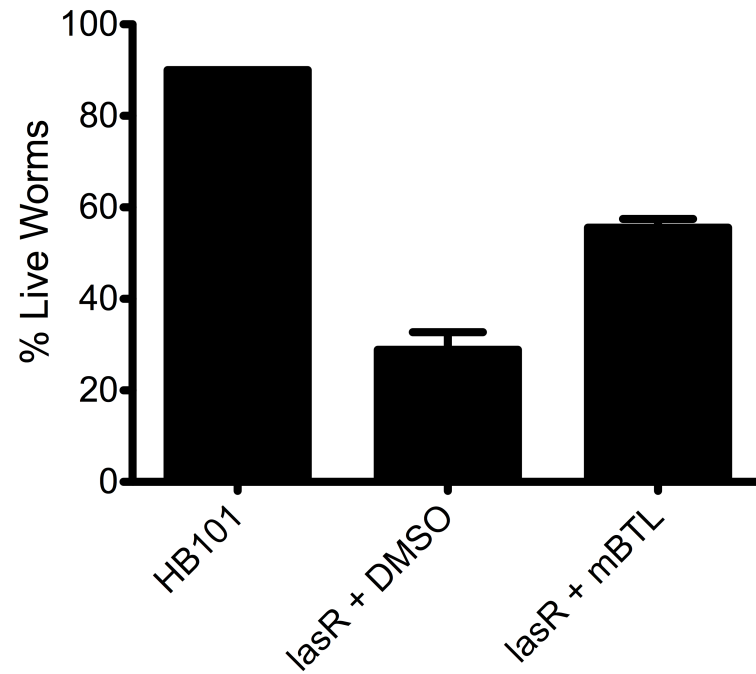

**Fig. S4: mBTL rescues *C. elegans* from killing by the *P. aeruginosa* PA14 *lasR* strain**

The % living worms was scored on plates containing the *lasR P. aeruginosa* mutant in the presence of 100  $\mu$ M mBTL and compared to plates containing DMSO after 5 hr. HB101 denotes the *E. coli* control strain. Error bars represent S.E.M. of three replicates.

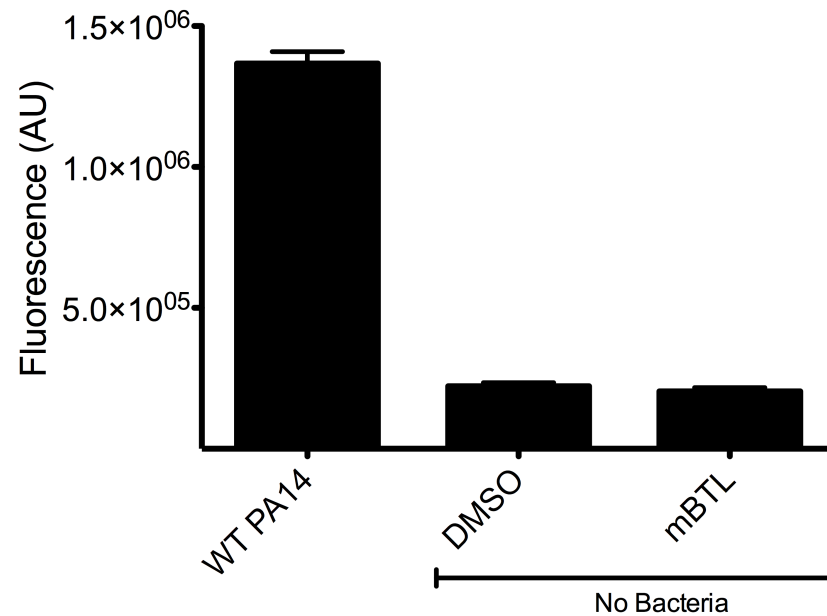

**Fig. S5: mBTL is not cytotoxic to A549 human lung cells**

A549 human lung cells were treated with 100  $\mu$ M mBTL or an equivalent amount of DMSO in the absence of bacteria. Fluorescence from propidium iodide uptake was measured after 8 hr. Error bars represent S.E.M. of six replicates. Lung cells treated with WT *P. aeruginosa* PA14 show the maximum level of propidium iodide uptake.

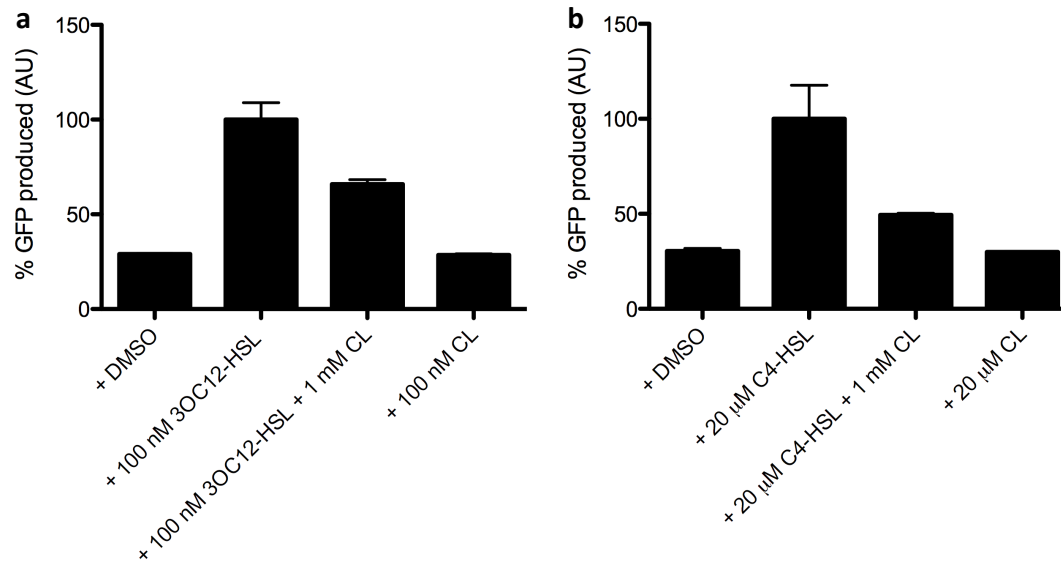

**Fig. S6: CL inhibits LasR- and RhIR-controlled transcription in *E. coli***

**a.** LasR activation of expression of *rsaL-gfp* in *E. coli*. **b.** RhIR activation of expression of *rhIA-gfp* in *E. coli*. In each panel, *gfp* expression in the presence of the cognate autoinducer (100 nM 3OC12-HSL or 20 μM C4-HSL) is set to 100%. CL was tested for inhibition at 1 mM and agonism at 100 nM for LasR and 20 μM for RhIR. Error bars represent S.D. of three replicates.



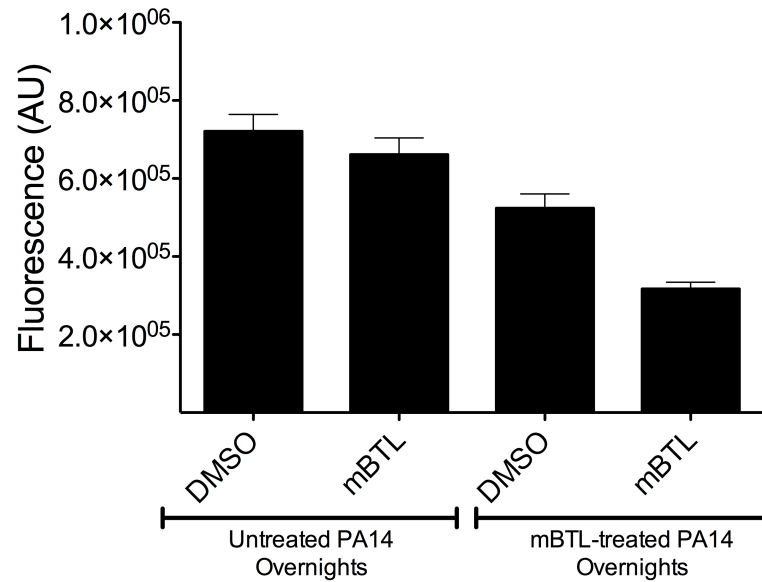

**Fig. S7: mBTL functions as a prophylactic**

Pelleted *P. aeruginosa* PA14 cells that had been grown for 17 hr in the presence of  $100 \mu\text{M}$  mBTL or an equivalent amount of DMSO were washed, resuspended in PBS, and added to human lung A549 cells. An additional  $100 \mu\text{M}$  mBTL or an equivalent amount of DMSO was added at the start of infection. Cell death was measured using fluorescence from propidium iodide uptake. Error bars indicate S.E.M. of six replicates.

**Table S1. Genes down-regulated by mBTL in the wild-type strain determined through microarray analysis.**

The ratio of gene expression in untreated cells to that of mBTL treated cells (fold down-regulation) is displayed for genes that exhibited changes greater than 2-fold. Additional columns indicate the genes that are also downregulated in the lasR and rhIR null strains. Ratios are the average of three independent experiments.

| Gene locus | Gene name    | Description                                 | Ratio | LasR-regulated | RhIR-regulated |
|------------|--------------|---------------------------------------------|-------|----------------|----------------|
| PA14_20020 | <i>hasAp</i> | heme acquisition protein HasAp              | 13.6  | *              | *              |
| PA14_21530 |              | ankyrin domain-containing protein           | 9.2   | *              | *              |
| PA14_54840 |              | tRNA-Gly                                    | 7.6   | *              | *              |
| PA14_53300 |              | alkyl hydroperoxide reductase               | 7.5   | *              | *              |
| PA14_30720 |              | tRNA-Cys                                    | 7.0   | *              | *              |
| PA14_39420 |              | hypothetical protein                        | 6.6   | *              | *              |
| PA14_07470 |              | tRNA-Met                                    | 6.5   | *              | *              |
| PA14_03090 |              | hypothetical protein                        | 6.5   | *              | *              |
| PA14_39960 | <i>phzB2</i> | phenazine biosynthesis protein              | 6.2   |                | *              |
| PA14_26990 |              | hypothetical protein                        | 5.9   | *              | *              |
| PA14_14570 |              | tRNA-Leu                                    | 5.7   | *              | *              |
| PA14_58710 |              | tRNA-Thr                                    | 5.7   | *              | *              |
| PA14_27190 |              | tRNA-Ser                                    | 5.6   | *              | *              |
| PA14_39970 | <i>phzA2</i> | phenazine biosynthesis protein              | 5.6   |                | *              |
| PA14_30420 |              | tRNA-Ser                                    | 5.5   | *              | *              |
| PA14_62790 |              | tRNA-Met                                    | 5.5   | *              | *              |
| PA14_51830 |              | DNA-binding stress protein                  | 5.5   | *              | *              |
| PA14_52320 |              | tRNA-Met                                    | 5.5   | *              | *              |
| PA14_24870 |              | tRNA-Pro                                    | 5.4   | *              | *              |
| PA14_51230 |              | tRNA-Ser                                    | 5.4   | *              | *              |
| PA14_09150 | <i>katA</i>  | catalase                                    | 5.3   | *              | *              |
| PA14_68150 |              | tRNA-Thr                                    | 5.0   | *              | *              |
| PA14_06810 | <i>norC</i>  | nitric-oxide reductase subunit C            | 4.9   | *              | *              |
| PA14_61830 |              | tRNA-Met                                    | 4.9   | *              | *              |
| PA14_60160 |              | tRNA-Pro                                    | 4.8   | *              | *              |
| PA14_22320 |              | hypothetical protein                        | 4.8   | *              | *              |
| PA14_18590 |              | hypothetical protein                        | 4.7   | *              | *              |
| PA14_51420 | <i>pqsB</i>  | PqsB                                        | 4.6   |                |                |
| PA14_41330 |              | tRNA-His                                    | 4.5   | *              | *              |
| PA14_27330 |              | phospho-2-dehydro-3-deoxyheptonate aldolase | 4.3   | *              | *              |
| PA14_28190 |              | tRNA-Val                                    | 4.1   | *              | *              |
| PA14_05860 |              | hypothetical protein                        | 4.0   | *              | *              |
| PA14_18800 |              | hypothetical protein                        | 4.0   | *              | *              |
| PA14_06830 | <i>norB</i>  | nitric-oxide reductase subunit B            | 3.9   | *              | *              |
| PA14_23570 |              | tRNA-Ala                                    | 3.8   | *              | *              |
| PA14_06875 |              | rsmYregulatoryRNA                           | 3.7   | *              | *              |
| PA14_01490 |              | hemolysin                                   | 3.7   |                | *              |
| PA14_48060 | <i>aprA</i>  | alkaline metalloproteinase                  | 3.6   | *              | *              |
| PA14_28660 | <i>infC</i>  | translation initiation factor IF-3          | 3.5   |                |                |
| PA14_01710 | <i>ahpC</i>  | alkyl hydroperoxide reductase               | 3.4   | *              | *              |
| PA14_36330 | <i>hcnA</i>  | hydrogen cyanide synthase HcnA              | 3.4   |                | *              |

|            |               |                                        |     |   |   |
|------------|---------------|----------------------------------------|-----|---|---|
| PA14_20500 |               | tRNA-Arg                               | 3.4 | * | * |
| PA14_51410 | <i>pqsC</i>   | PqsC                                   | 3.3 |   |   |
| PA14_28740 |               | tRNA-Pro                               | 3.3 |   | * |
| PA14_13950 |               | hypothetical protein                   | 3.2 |   |   |
| PA14_50290 | <i>fliC</i>   | flagellin type B                       | 3.2 |   |   |
| PA14_08900 | <i>rplV</i>   | 50S ribosomal protein L22              | 3.2 |   |   |
| PA14_08220 |               | hypothetical protein                   | 3.2 |   |   |
| PA14_58040 |               | hypothetical protein                   | 3.1 | * | * |
| PA14_15990 | <i>trmD</i>   | tRNA (guanine-N(1)-)-methyltransferase | 3.1 |   |   |
| PA14_01720 | <i>ahpF</i>   | alkyl hydroperoxide reductase          | 3.1 | * | * |
| PA14_51610 |               | hypothetical protein                   | 3.1 |   |   |
| PA14_53290 | <i>trxB2</i>  | thioredoxin reductase 2                | 3.1 | * | * |
| PA14_09470 | <i>phzB1</i>  | phenazine biosynthesis protein         | 3.1 |   | * |
| PA14_26980 |               | hypothetical protein                   | 3.0 | * | * |
| PA14_63460 |               | tRNA-Sec                               | 3.0 |   | * |
| PA14_41340 |               | tRNA-Arg                               | 3.0 | * | * |
| PA14_28720 | <i>ihfA</i>   | integration host factor subunit alpha  | 3.0 |   |   |
| PA14_08930 | <i>rpmC</i>   | 50S ribosomal protein L29              | 3.0 |   |   |
| PA14_59230 |               | colicin immunity protein               | 3.0 |   |   |
| PA14_39470 |               | hypothetical protein                   | 3.0 |   |   |
| PA14_69200 | <i>trxA</i>   | thioredoxin                            | 3.0 | * | * |
| PA14_61040 | <i>katB</i>   | catalase                               | 2.9 | * | * |
| PA14_60480 |               | hypothetical protein                   | 2.9 |   |   |
| PA14_08880 | <i>rplB</i>   | 50S ribosomal protein L2               | 2.9 |   |   |
| PA14_14560 |               | hypothetical protein                   | 2.9 |   |   |
| PA14_08660 |               | tRNA-Gly                               | 2.9 | * | * |
| PA14_36320 | <i>hcnB</i>   | hydrogen cyanide synthase HcnB         | 2.8 |   | * |
| PA14_03410 |               | tRNA-Arg                               | 2.8 | * | * |
| PA14_28670 | <i>rpmI</i>   | 50S ribosomal protein L35              | 2.8 |   |   |
| PA14_53610 |               | hypothetical protein                   | 2.8 |   |   |
| PA14_09130 | <i>rplQ</i>   | 50S ribosomal protein L17              | 2.7 |   |   |
| PA14_07680 |               | hypothetical protein                   | 2.7 |   |   |
| PA14_41320 |               | tRNA-Leu                               | 2.7 | * |   |
| PA14_68030 |               | tRNA-Phe                               | 2.7 | * | * |
| PA14_62680 |               | hypothetical protein                   | 2.7 |   |   |
| PA14_38180 |               | hypothetical protein                   | 2.7 |   |   |
| PA14_10230 | <i>adh</i>    | 2,3-butanediol dehydrogenase           | 2.6 |   |   |
| PA14_58010 |               | hypothetical protein                   | 2.6 |   |   |
| PA14_20290 |               | DNA binding-protein                    | 2.6 |   |   |
| PA14_09080 | <i>rpsM</i>   | 30S ribosomal protein S13              | 2.6 |   |   |
| PA14_49520 | <i>pyoS3A</i> | pyocin killing protein                 | 2.6 |   |   |
| PA14_55940 |               | hypothetical protein                   | 2.6 | * | * |
| PA14_70190 | <i>rpmB</i>   | 50S ribosomal protein L28              | 2.6 |   |   |
| PA14_09540 | <i>mexG</i>   | hypothetical protein                   | 2.6 |   | * |
| PA14_58000 | <i>sodM</i>   | superoxide dismutase                   | 2.5 |   |   |
| PA14_51380 | <i>pqsE</i>   | quinolone signal response protein      | 2.5 |   |   |
| PA14_35840 |               | hypothetical protein                   | 2.5 |   |   |
| PA14_18690 |               | peroxidase                             | 2.5 |   |   |

|            |               |                                                   |     |   |   |
|------------|---------------|---------------------------------------------------|-----|---|---|
| PA14_49030 |               | hypothetical protein                              | 2.5 |   |   |
| PA14_28680 | <i>rplT</i>   | 50S ribosomal protein L20                         | 2.5 |   |   |
| PA14_48140 |               | hypothetical protein                              | 2.5 | * | * |
| PA14_23410 | <i>orfJ</i>   | glycosyl transferase family protein               | 2.5 |   |   |
| PA14_58030 | <i>fumC</i>   | fumarate hydratase                                | 2.5 |   |   |
| PA14_18070 |               | periplasmic metal-binding protein                 | 2.5 | * | * |
| PA14_51390 | <i>pqsD</i>   | 3-oxoacyl-ACP synthase                            | 2.5 |   |   |
| PA14_23330 | <i>rpsA</i>   | 30S ribosomal protein S1                          | 2.5 |   |   |
| PA14_24650 | <i>rmf</i>    | ribosome modulation factor                        | 2.5 |   |   |
| PA14_14300 |               | zinc-binding oxidoreductase                       | 2.5 |   |   |
| PA14_49470 | <i>nrdB</i>   | ribonucleotide-diphosphate reductase subunit beta | 2.5 |   |   |
| PA14_57460 |               | cell division protein MraZ                        | 2.5 |   |   |
| PA14_08820 | <i>fusA1</i>  | elongation factor G                               | 2.4 |   |   |
| PA14_17480 | <i>rpoS</i>   | RNA polymerase sigma factor RpoS                  | 2.4 | * |   |
| PA14_09090 | <i>rpsK</i>   | 30S ribosomal protein S11                         | 2.4 |   |   |
| PA14_35160 |               | hypothetical protein                              | 2.4 |   | * |
| PA14_62690 |               | hypothetical protein                              | 2.4 | * |   |
| PA14_19590 |               | molybdopterin-binding protein                     | 2.4 |   | * |
| PA14_57950 |               | hypothetical protein                              | 2.4 |   |   |
| PA14_23360 | <i>wzz</i>    | O-antigen chain length regulator                  | 2.4 |   |   |
| PA14_20050 |               | outer membrane protein                            | 2.4 | * |   |
| PA14_41230 | <i>clpX</i>   | ATP-dependent protease ATP-binding subunit ClpX   | 2.4 |   |   |
| PA14_59430 |               | hypothetical protein                              | 2.4 |   |   |
| PA14_50880 |               | hypothetical protein                              | 2.4 |   |   |
| PA14_06750 | <i>nirS</i>   | nitrite reductase                                 | 2.4 | * | * |
| PA14_49510 | <i>pyoS3I</i> | immunity protein S3I structureal gene             | 2.4 |   |   |
| PA14_64500 |               | transcriptional regulator                         | 2.4 | * | * |
| PA14_28780 |               | hypothetical protein                              | 2.3 |   |   |
| PA14_30210 | <i>clpS</i>   | ATP-dependent Clp protease adaptor protein ClpS   | 2.3 |   |   |
| PA14_69370 | <i>algP</i>   | alginate regulatory protein AlgP                  | 2.3 |   |   |
| PA14_41570 | <i>oprF</i>   | precursor                                         | 2.3 |   |   |
| PA14_09270 | <i>pchE</i>   | dihydroaeruginic acid synthetase                  | 2.3 |   | * |
| PA14_08790 | <i>rpsL</i>   | 30S ribosomal protein S12                         | 2.3 |   |   |
| PA14_35760 |               | hypothetical protein                              | 2.3 |   |   |
| PA14_53590 |               | hypothetical protein                              | 2.3 |   |   |
| PA14_19110 | <i>rhlB</i>   | rhamnosyltransferase chain B                      | 2.3 |   | * |
| PA14_13940 |               | S-type pyocin protein                             | 2.3 |   |   |
| PA14_35850 |               | hypothetical protein                              | 2.3 |   |   |
| PA14_08810 | <i>rpsG</i>   | 30S ribosomal protein S7                          | 2.3 |   |   |
| PA14_09340 | <i>fptA</i>   | Fe(III)-pyochelin outer membrane receptor         | 2.3 |   |   |
| PA14_65180 | <i>rpsF</i>   | 30S ribosomal protein S6                          | 2.2 |   |   |
| PA14_48040 | <i>aprI</i>   | alkaline proteinase inhibitor AprI                | 2.2 | * | * |
| PA14_68940 |               | hypothetical protein                              | 2.2 |   | * |
| PA14_51430 | <i>pqsA</i>   | coenzyme A ligase                                 | 2.2 |   |   |
| PA14_29570 |               | hypothetical protein                              | 2.2 |   |   |
| PA14_08720 | <i>rplK</i>   | 50S ribosomal protein L11                         | 2.2 |   |   |
| PA14_08910 | <i>rpsC</i>   | 30S ribosomal protein S3                          | 2.2 |   |   |

|            |              |                                                |     |   |   |
|------------|--------------|------------------------------------------------|-----|---|---|
| PA14_59400 |              | hypothetical protein                           | 2.2 |   |   |
| PA14_09210 | <i>pchA</i>  | salicylate biosynthesis isochorismate synthase | 2.2 |   |   |
| PA14_59610 |              | hypothetical protein                           | 2.2 |   |   |
| PA14_59190 |              | hypothetical protein                           | 2.2 |   |   |
| PA14_14750 |              | iron-binding protein IscA                      | 2.2 |   | * |
| PA14_56070 | <i>mvaT</i>  | transcriptional regulator MvaT, P16 subunit    | 2.2 |   |   |
| PA14_08690 |              | tRNA-Trp                                       | 2.2 |   | * |
| PA14_19100 | <i>rhlA</i>  | rhamnosyltransferase chain A                   | 2.2 |   | * |
| PA14_33750 |              | outer membrane protein                         | 2.2 | * | * |
| PA14_08840 | <i>rpsJ</i>  | 30S ribosomal protein S10                      | 2.2 |   |   |
| PA14_45960 | <i>lasR</i>  | transcriptional regulator LasR                 | 2.2 | * |   |
| PA14_60960 |              | hypothetical protein                           | 2.2 |   |   |
| PA14_68340 | <i>arcB</i>  | ornithine carbamoyltransferase                 | 2.2 |   |   |
| PA14_19490 |              | antioxidant protein                            | 2.2 |   | * |
| PA14_61760 |              | tRNA-Gln                                       | 2.2 | * | * |
| PA14_25630 | <i>rpmF</i>  | 50S ribosomal protein L32                      | 2.2 |   |   |
| PA14_23400 |              | hypothetical protein                           | 2.2 |   |   |
| PA14_70180 | <i>rpmG</i>  | 50S ribosomal protein L33                      | 2.2 |   |   |
| PA14_51810 |              | hypothetical protein                           | 2.2 |   |   |
| PA14_08730 | <i>rplA</i>  | 50S ribosomal protein L1                       | 2.2 |   |   |
| PA14_23390 | <i>orfE</i>  | polysaccharide biosynthesis protein            | 2.2 |   |   |
| PA14_30190 | <i>icd</i>   | isocitrate dehydrogenase                       | 2.2 |   |   |
| PA14_15850 |              | hypothetical protein                           | 2.2 |   |   |
| PA14_10560 |              | hypothetical protein                           | 2.2 |   | * |
| PA14_23340 | <i>ihfB</i>  | integration host factor subunit beta           | 2.2 |   |   |
| PA14_53070 | <i>hpd</i>   | 4-hydroxyphenylpyruvate dioxygenase            | 2.2 |   |   |
| PA14_20010 | <i>hasR</i>  | heme uptake outer membrane receptor HasR       | 2.2 |   |   |
| PA14_41250 | <i>tig</i>   | trigger factor                                 | 2.2 |   |   |
| PA14_08850 | <i>rplC</i>  | 50S ribosomal protein L3                       | 2.2 |   |   |
| PA14_08960 | <i>rplX</i>  | 50S ribosomal protein L24                      | 2.2 |   |   |
| PA14_51350 | <i>phnB</i>  | anthranilate synthase component II             | 2.2 |   |   |
| PA14_09115 | <i>rpoA</i>  | DNA-directed RNA polymerase subunit alpha      | 2.2 |   |   |
| PA14_59390 |              | hypothetical protein                           | 2.1 |   | * |
| PA14_67190 |              | hypothetical protein                           | 2.1 |   |   |
| PA14_37520 |              | hypothetical protein                           | 2.1 |   |   |
| PA14_61380 |              | hypothetical protein                           | 2.1 | * |   |
| PA14_17440 | <i>truD</i>  | tRNA pseudouridine synthase D                  | 2.1 |   |   |
| PA14_20530 |              | hypothetical protein                           | 2.1 |   |   |
| PA14_08890 | <i>rpsS</i>  | 30S ribosomal protein S19                      | 2.1 |   |   |
| PA14_14730 | <i>iscS</i>  | cysteine desulfurase                           | 2.1 |   |   |
| PA14_73300 | <i>atpE</i>  | F0F1 ATP synthase subunit C                    | 2.1 |   |   |
| PA14_54490 |              | hypothetical protein                           | 2.1 | * |   |
| PA14_09480 | <i>phzA1</i> | phenazine biosynthesis protein                 | 2.1 |   |   |
| PA14_12260 |              | hypothetical protein                           | 2.1 |   |   |
| PA14_59620 |              | hypothetical protein                           | 2.1 |   |   |
| PA14_28710 | <i>pheT</i>  | phenylalanyl-tRNA synthetase subunit beta      | 2.1 |   |   |
| PA14_20610 | <i>lecB</i>  | fucose-binding lectin PA-IIL                   | 2.1 |   | * |
| PA14_08970 | <i>rplE</i>  | 50S ribosomal protein L5                       | 2.1 |   |   |

|            |              |                                                                |     |   |   |
|------------|--------------|----------------------------------------------------------------|-----|---|---|
| PA14_56780 | <i>sodB</i>  | superoxide dismutase                                           | 2.1 |   |   |
| PA14_31350 |              | hypothetical protein                                           | 2.1 |   | * |
| PA14_16830 |              | hypothetical protein                                           | 2.1 |   |   |
| PA14_52990 | <i>phhA</i>  | phenylalanine 4-monooxygenase                                  | 2.1 |   |   |
| PA14_49200 | <i>oprH</i>  | PhoP/Q and low Mg <sup>2+</sup> inducible outer membrane prote | 2.1 |   |   |
| PA14_53340 |              | hypothetical protein                                           | 2.1 |   |   |
| PA14_49860 |              | hypothetical protein                                           | 2.1 |   |   |
| PA14_08750 | <i>rplL</i>  | 50S ribosomal protein L7/L12                                   | 2.1 |   |   |
| PA14_13460 |              | RNA polymerase sigma factor                                    | 2.1 | * | * |
| PA14_07480 |              | reverse transcriptase                                          | 2.0 |   |   |
| PA14_08870 | <i>rplW</i>  | 50S ribosomal protein L23                                      | 2.0 |   |   |
| PA14_09220 | <i>pchB</i>  | isochorismate-pyruvate lyase                                   | 2.0 |   |   |
| PA14_59590 |              | hypothetical protein                                           | 2.0 |   |   |
| PA14_62720 | <i>rpsO</i>  | 30S ribosomal protein S15                                      | 2.0 | * | * |
| PA14_66875 | <i>phaF</i>  | polyhydroxyalkanoate synthesis protein PhaF                    | 2.0 |   |   |
| PA14_04300 |              | hypothetical protein                                           | 2.0 |   |   |
| PA14_37420 |              | transmembrane sensor protein                                   | 2.0 |   |   |
| PA14_14740 |              | scaffold protein                                               | 2.0 |   | * |
| PA14_55810 |              | two-component response regulator                               | 2.0 |   |   |
| PA14_41210 | <i>hupB</i>  | DNA-binding protein HU                                         | 2.0 |   | * |
| PA14_10490 |              | hypothetical protein                                           | 2.0 |   | * |
| PA14_16910 |              | hypothetical protein                                           | 2.0 |   |   |
| PA14_57010 | <i>groEL</i> | chaperonin GroEL                                               | 2.0 |   |   |
| PA14_02260 |              | two-component response regulator                               | 2.0 | * |   |
| PA14_50280 |              | hypothetical protein                                           | 2.0 |   |   |
| PA14_09000 | <i>rplF</i>  | 50S ribosomal protein L6                                       | 2.0 |   |   |
|            |              | type 4 fimbrial biogenesis outer membrane protein PilQ         |     |   |   |
| PA14_66620 | <i>pilQ</i>  | precursor                                                      | 2.0 |   |   |
| PA14_59380 |              | hypothetical protein                                           | 2.0 |   |   |
| PA14_09020 | <i>rpsE</i>  | 30S ribosomal protein S5                                       | 2.0 |   |   |

**Supplemental Table 2. Genes down-regulated by disruption of the *lasR* gene determined through microarray analysis.** The ratio of gene expression of the wild-type strain to that of the *lasR* null strain (fold down-regulation) is displayed for genes that exhibited changes greater than 2-fold. Ratios are the average of three independent experiments.

| Gene locus | Gene name    | Description                                 | Ratio |
|------------|--------------|---------------------------------------------|-------|
| PA14_45960 | <i>lasR</i>  | transcriptional regulator LasR              | 81.7  |
| PA14_06810 | <i>norC</i>  | nitric-oxide reductase subunit C            | 74.5  |
| PA14_22320 |              | hypothetical protein                        | 52.0  |
| PA14_20020 | <i>hasAp</i> | heme acquisition protein HasAp              | 34.9  |
| PA14_21530 |              | ankyrin domain-containing protein           | 33.1  |
| PA14_33290 |              | hypothetical protein                        | 28.1  |
| PA14_45950 | <i>rsaL</i>  | regulatory protein RsaL                     | 23.4  |
| PA14_01720 | <i>ahpF</i>  | alkyl hydroperoxide reductase               | 23.3  |
| PA14_26990 |              | hypothetical protein                        | 21.5  |
| PA14_53290 | <i>trxB2</i> | thioredoxin reductase 2                     | 20.9  |
| PA14_09150 | <i>katA</i>  | catalase                                    | 16.7  |
| PA14_03090 |              | hypothetical protein                        | 15.8  |
| PA14_53300 |              | alkyl hydroperoxide reductase               | 15.3  |
| PA14_06830 | <i>norB</i>  | nitric-oxide reductase subunit B            | 15.3  |
| PA14_40260 |              | hypothetical protein                        | 12.8  |
| PA14_01710 | <i>ahpC</i>  | alkyl hydroperoxide reductase               | 12.8  |
| PA14_52320 |              | tRNA-Met                                    | 12.4  |
| PA14_62790 |              | tRNA-Met                                    | 12.3  |
| PA14_10380 |              | hypothetical protein                        | 11.8  |
| PA14_58710 |              | tRNA-Thr                                    | 11.2  |
| PA14_39420 |              | hypothetical protein                        | 11.1  |
| PA14_06875 |              | rsmYregulatoryRNA                           | 11.1  |
| PA14_68150 |              | tRNA-Thr                                    | 11.0  |
| PA14_18590 |              | hypothetical protein                        | 9.7   |
| PA14_51230 |              | tRNA-Ser                                    | 8.7   |
| PA14_30420 |              | tRNA-Ser                                    | 8.7   |
| PA14_05860 |              | hypothetical protein                        | 8.6   |
| PA14_72370 |              | hypothetical protein                        | 7.9   |
| PA14_27330 |              | phospho-2-dehydro-3-deoxyheptonate aldolase | 7.5   |
| PA14_55940 |              | hypothetical protein                        | 7.3   |
| PA14_20500 |              | tRNA-Arg                                    | 7.3   |
| PA14_07470 |              | tRNA-Met                                    | 7.2   |
| PA14_39780 |              | hypothetical protein                        | 6.8   |
| PA14_48060 | <i>aprA</i>  | alkaline metalloproteinase                  | 6.4   |
| PA14_54840 |              | tRNA-Gly                                    | 6.3   |
| PA14_28190 |              | tRNA-Val                                    | 6.2   |
| PA14_41340 |              | tRNA-Arg                                    | 5.9   |
| PA14_24870 |              | tRNA-Pro                                    | 5.7   |
| PA14_51830 |              | DNA-binding stress protein                  | 5.7   |
| PA14_18800 |              | hypothetical protein                        | 5.6   |
| PA14_61040 | <i>katB</i>  | catalase                                    | 5.4   |
| PA14_14570 |              | tRNA-Leu                                    | 5.2   |

|            |              |                                              |     |
|------------|--------------|----------------------------------------------|-----|
| PA14_09900 | <i>prpL</i>  | Pvds-regulated endoprotease, lysyl class     | 5.1 |
| PA14_26980 |              | hypothetical protein                         | 5.0 |
| PA14_03410 |              | tRNA-Arg                                     | 4.8 |
| PA14_52560 |              | tRNA-Ser                                     | 4.7 |
| PA14_60160 |              | tRNA-Pro                                     | 4.4 |
| PA14_23570 |              | tRNA-Ala                                     | 4.1 |
| PA14_64500 |              | transcriptional regulator                    | 4.0 |
| PA14_36820 |              | hypothetical protein                         | 4.0 |
| PA14_08670 |              | tRNA-Thr                                     | 4.0 |
| PA14_41330 |              | tRNA-His                                     | 4.0 |
| PA14_40240 |              | ABC transporter ATP-binding protein/permease | 4.0 |
| PA14_36560 |              | hypothetical protein                         | 3.9 |
| PA14_01290 | <i>coxB</i>  | cytochrome c oxidase subunit II              | 3.9 |
| PA14_27190 |              | tRNA-Ser                                     | 3.8 |
| PA14_48040 | <i>aprI</i>  | alkaline proteinase inhibitor AprI           | 3.8 |
| PA14_40230 |              | secretion protein                            | 3.8 |
| PA14_16720 |              | hypothetical protein                         | 3.7 |
| PA14_35340 |              | 2-ketogluconate kinase                       | 3.7 |
| PA14_61380 |              | hypothetical protein                         | 3.7 |
| PA14_28600 |              | hypothetical protein                         | 3.6 |
| PA14_48610 |              | sparagine synthase                           | 3.6 |
| PA14_72360 |              | hypothetical protein                         | 3.6 |
| PA14_61760 |              | tRNA-Gln                                     | 3.5 |
| PA14_13390 |              | hypothetical protein                         | 3.5 |
| PA14_17980 | <i>glpF</i>  | glycerol uptake facilitator protein          | 3.5 |
| PA14_22100 |              | hypothetical protein                         | 3.5 |
| PA14_01780 |              | nucleoside 2-deoxyribosyltransferase         | 3.5 |
| PA14_49130 | <i>dctA</i>  | C4-dicarboxylate transporter DctA            | 3.4 |
| PA14_72060 |              | hypothetical protein                         | 3.3 |
| PA14_24860 | <i>snr1</i>  | cytochrome c Snr1                            | 3.3 |
| PA14_46750 |              | hypothetical protein                         | 3.3 |
| PA14_62720 | <i>rpsO</i>  | 30S ribosomal protein S15                    | 3.2 |
| PA14_01300 | <i>coxA</i>  | cytochrome c oxidase subunit I               | 3.2 |
| PA14_28620 |              | hypothetical protein                         | 3.2 |
| PA14_56910 |              | hypothetical protein                         | 3.1 |
| PA14_66880 |              | hypothetical protein                         | 3.1 |
| PA14_55790 |              | hypothetical protein                         | 3.0 |
| PA14_06750 | <i>nirS</i>  | nitrite reductase                            | 3.0 |
| PA14_61830 |              | tRNA-Met                                     | 3.0 |
| PA14_01320 | <i>collI</i> | cytochrome c oxidase subunit III             | 2.9 |
| PA14_01350 |              | hypothetical protein                         | 2.9 |
| PA14_00300 | <i>plcB</i>  | phospholipase C, PlcB                        | 2.8 |
| PA14_62810 | <i>secG</i>  | preprotein translocase subunit SecG          | 2.7 |
| PA14_22880 |              | Fe-S protein                                 | 2.7 |
| PA14_13350 |              | hypothetical protein                         | 2.7 |
| PA14_13460 |              | RNA polymerase sigma factor                  | 2.7 |
| PA14_62870 | <i>rrmJ</i>  | cell division protein FtsJ                   | 2.7 |
| PA14_68030 |              | tRNA-Phe                                     | 2.7 |



|            |              |                                          |     |
|------------|--------------|------------------------------------------|-----|
| PA14_69200 | <i>trxA</i>  | thioredoxin                              | 2.7 |
| PA14_53250 | <i>cpbD</i>  | chitin-binding protein CbpD              | 2.7 |
| PA14_58040 |              | hypothetical protein                     | 2.6 |
| PA14_57030 | <i>fxsA</i>  | FxsA protein                             | 2.6 |
| PA14_08660 |              | tRNA-Gly                                 | 2.6 |
| PA14_53630 |              | hypothetical protein                     | 2.6 |
| PA14_17480 | <i>rpoS</i>  | RNA polymerase sigma factor RpoS         | 2.6 |
| PA14_33050 |              | hypothetical protein                     | 2.6 |
| PA14_54490 |              | hypothetical protein                     | 2.5 |
| PA14_02500 | <i>exbB1</i> | transport protein ExbB                   | 2.5 |
| PA14_20050 |              | outer membrane protein                   | 2.5 |
| PA14_62860 | <i>ftsH</i>  | cell division protein FtsH               | 2.5 |
| PA14_06770 | <i>nirQ</i>  | regulatory protein NirQ                  | 2.5 |
| PA14_53840 |              | hypothetical protein                     | 2.5 |
| PA14_38550 | <i>maiA</i>  | maleylacetoacetate isomerase             | 2.5 |
| PA14_00790 | <i>prlC</i>  | oligopeptidase A                         | 2.5 |
| PA14_18070 |              | periplasmic metal-binding protein        | 2.5 |
| PA14_07890 |              | ABC transporter permease                 | 2.4 |
| PA14_38825 | <i>pqqA</i>  | coenzyme PQQ synthesis protein PqqA      | 2.4 |
| PA14_55920 |              | type II secretion system protein         | 2.4 |
| PA14_13380 |              | hypothetical protein                     | 2.4 |
| PA14_20770 |              | hypothetical protein                     | 2.4 |
| PA14_22310 |              | hypothetical protein                     | 2.4 |
| PA14_63170 |              | transcriptional regulator                | 2.4 |
| PA14_47190 | <i>cyoB</i>  | cytochrome o ubiquinol oxidase subunit I | 2.3 |
| PA14_02510 | <i>exbD1</i> | transport protein ExbD                   | 2.3 |
| PA14_67770 | <i>pgm</i>   | phosphoglyceromutase                     | 2.3 |
| PA14_62690 |              | hypothetical protein                     | 2.3 |
| PA14_26020 |              | aminopeptidase                           | 2.3 |
| PA14_61060 |              | oxidoreductase                           | 2.3 |
| PA14_30720 |              | tRNA-Cys                                 | 2.3 |
| PA14_48140 |              | hypothetical protein                     | 2.3 |
| PA14_36920 |              | hypothetical protein                     | 2.3 |
| PA14_25180 | <i>psrA</i>  | transcriptional regulator PsrA           | 2.3 |
| PA14_58070 |              | hypothetical protein                     | 2.3 |
| PA14_53160 |              | hypothetical protein                     | 2.3 |
| PA14_42200 |              | hypothetical protein                     | 2.3 |
| PA14_35980 |              | acyl-CoA dehydrogenase                   | 2.3 |
| PA14_49050 |              | hypothetical protein                     | 2.3 |
| PA14_12130 | <i>lis</i>   | lipoyl synthase                          | 2.3 |
| PA14_40250 |              | outer membrane protein                   | 2.3 |
| PA14_60750 | <i>pra</i>   | protein activator                        | 2.3 |
| PA14_05020 |              | hypothetical protein                     | 2.2 |
| PA14_13370 |              | hypothetical protein                     | 2.2 |
| PA14_23680 | <i>ibpA</i>  | heat-shock protein IbpA                  | 2.2 |
| PA14_20480 |              | hypothetical protein                     | 2.2 |
| PA14_11510 | <i>ribA</i>  | GTP cyclohydrolase II                    | 2.2 |
| PA14_53210 |              | hypothetical protein                     | 2.2 |

|            |              |                                                    |     |
|------------|--------------|----------------------------------------------------|-----|
| PA14_41320 |              | tRNA-Leu                                           | 2.2 |
| PA14_35360 |              | hypothetical protein                               | 2.1 |
| PA14_36980 |              | hypothetical protein                               | 2.1 |
| PA14_72870 |              | aminotransferase                                   | 2.1 |
| PA14_20780 |              | two-component response regulator                   | 2.1 |
| PA14_63480 |              | amino acid permease                                | 2.1 |
| PA14_54430 | <i>algU</i>  | RNA polymerase sigma factor AlgU                   | 2.1 |
| PA14_33060 |              | hypothetical protein                               | 2.1 |
| PA14_28140 |              | hypothetical protein                               | 2.1 |
| PA14_72170 |              | citrate transporter                                | 2.1 |
| PA14_53040 |              | lysozyme inhibitor                                 | 2.1 |
| PA14_11610 |              | ABC transporter permease                           | 2.1 |
| PA14_02260 |              | two-component response regulator                   | 2.1 |
| PA14_61020 |              | hypothetical protein                               | 2.1 |
| PA14_19870 | <i>ldh</i>   | leucine dehydrogenase                              | 2.1 |
| PA14_72970 | <i>tonB</i>  | TonB protein                                       | 2.1 |
| PA14_33750 |              | outer membrane protein                             | 2.1 |
| PA14_34330 |              | hypothetical protein                               | 2.1 |
| PA14_00480 |              | hypothetical protein                               | 2.1 |
| PA14_60500 | <i>fkIB</i>  | peptidyl-prolyl cis-trans isomerase FkIB           | 2.1 |
| PA14_09700 |              | monooxygenase                                      | 2.1 |
| PA14_16250 | <i>lasB</i>  | elastase LasB                                      | 2.0 |
| PA14_49460 | <i>nrdA</i>  | ribonucleotide-diphosphate reductase subunit alpha | 2.0 |
| PA14_72140 |              | hypothetical protein                               | 2.0 |
| PA14_35370 | <i>ptxS</i>  | transcriptional regulator PtxS                     | 2.0 |
| PA14_66550 | <i>hemE</i>  | uroporphyrinogen decarboxylase                     | 2.0 |
| PA14_12030 |              | hypothetical protein                               | 2.0 |
| PA14_70490 |              | lipoprotein                                        | 2.0 |
| PA14_38060 |              | hypothetical protein                               | 2.0 |
| PA14_73230 | <i>atpC</i>  | F0F1 ATP synthase subunit epsilon                  | 2.0 |
| PA14_72770 |              | hypothetical protein                               | 2.0 |
| PA14_47530 |              | hypothetical protein                               | 2.0 |
| PA14_66400 |              | potassium efflux protein KefA                      | 2.0 |
| PA14_37410 |              | hypothetical protein                               | 2.0 |
| PA14_44700 | <i>alkB2</i> | alkane-1 monooxygenase                             | 2.0 |

**Supplemental Table 3. Genes down-regulated by disruption of the *rhIR* gene determined through microarray analysis.** The ratio of gene expression of the wild-type strain to that of the *rhIR* null strain (fold down-regulation) is displayed for genes that exhibited changes greater than 2-fold. Ratios are the average of three independent experiments.

| Gene locus | Gene name    | Description                        | Ratio |
|------------|--------------|------------------------------------|-------|
| PA14_10360 |              | hypothetical protein               | 54.5  |
| PA14_22320 |              | hypothetical protein               | 47.2  |
| PA14_34870 | <i>chiC</i>  | chitinase                          | 44.6  |
| PA14_15350 |              | integrase                          | 43.8  |
| PA14_18800 |              | hypothetical protein               | 42.7  |
| PA14_15600 |              | hypothetical protein               | 35.7  |
| PA14_01720 | <i>ahpF</i>  | alkyl hydroperoxide reductase      | 34.7  |
| PA14_53250 | <i>cpbD</i>  | chitin-binding protein CbpD        | 33.7  |
| PA14_21530 |              | ankyrin domain-containing protein  | 32.7  |
| PA14_20610 | <i>lecB</i>  | fucose-binding lectin PA-III       | 29.6  |
| PA14_53290 | <i>trxB2</i> | thioredoxin reductase 2            | 26.8  |
| PA14_19100 | <i>rhlA</i>  | rhamnosyltransferase chain A       | 24.4  |
| PA14_06810 | <i>norC</i>  | nitric-oxide reductase subunit C   | 23.6  |
| PA14_01490 |              | hemolysin                          | 23.2  |
| PA14_15480 | <i>merR</i>  | transcriptional regulator MerR     | 23.1  |
| PA14_15610 |              | hypothetical protein               | 22.7  |
| PA14_26990 |              | hypothetical protein               | 22.6  |
| PA14_53300 |              | alkyl hydroperoxide reductase      | 19.6  |
| PA14_11140 |              | nonribosomal peptide synthetase    | 18.4  |
| PA14_09540 | <i>mexG</i>  | hypothetical protein               | 16.3  |
| PA14_01710 | <i>ahpC</i>  | alkyl hydroperoxide reductase      | 16.0  |
| PA14_40310 |              | acyl carrier protein               | 15.9  |
| PA14_03090 |              | hypothetical protein               | 15.6  |
| PA14_28360 |              | hypothetical protein               | 15.2  |
| PA14_38270 |              | hypothetical protein               | 15.1  |
| PA14_37745 |              | carbamoyl transferase              | 14.3  |
| PA14_16250 | <i>lasB</i>  | elastase LasB                      | 14.2  |
| PA14_06830 | <i>norB</i>  | nitric-oxide reductase subunit B   | 13.9  |
| PA14_09150 | <i>katA</i>  | catalase                           | 13.6  |
| PA14_15560 |              | hypothetical protein               | 11.1  |
| PA14_51230 |              | tRNA-Ser                           | 10.5  |
| PA14_09530 | <i>mexH</i>  | RND efflux membrane fusion protein | 10.3  |
| PA14_05860 |              | hypothetical protein               | 9.9   |
| PA14_54840 |              | tRNA-Gly                           | 9.8   |
| PA14_03510 |              | hypothetical protein               | 9.7   |
| PA14_68940 |              | hypothetical protein               | 9.7   |
| PA14_39420 |              | hypothetical protein               | 9.2   |
| PA14_31290 | <i>pa1L</i>  | PA-I galactophilic lectin          | 9.0   |
| PA14_19590 |              | molybdopterin-binding protein      | 8.7   |
| PA14_16100 |              | hypothetical protein               | 8.4   |
| PA14_68150 |              | tRNA-Thr                           | 8.2   |
| PA14_52320 |              | tRNA-Met                           | 8.1   |
| PA14_62790 |              | tRNA-Met                           | 7.7   |
| PA14_15520 | <i>trbJ</i>  | conjugal transfer protein TrbJ     | 7.3   |
| PA14_40290 | <i>lasA</i>  | LasA protease                      | 7.2   |
| PA14_30720 |              | tRNA-Cys                           | 7.1   |
| PA14_58710 |              | tRNA-Thr                           | 6.6   |
| PA14_03520 |              | hypothetical protein               | 6.4   |
| PA14_31360 |              | hypothetical protein               | 6.4   |

|            |              |                                                |     |
|------------|--------------|------------------------------------------------|-----|
| PA14_24870 |              | tRNA-Pro                                       | 6.2 |
| PA14_15580 |              | Type II restriction enzyme, methylase subunit  | 6.2 |
| PA14_32950 |              | hypothetical protein                           | 6.1 |
| PA14_51830 |              | DNA-binding stress protein                     | 6.1 |
| PA14_53840 |              | hypothetical protein                           | 6.0 |
| PA14_18590 |              | hypothetical protein                           | 5.8 |
| PA14_34880 |              | GntR family transcriptional regulator          | 5.6 |
| PA14_28190 |              | tRNA-Val                                       | 5.5 |
| PA14_49760 | <i>rhIC</i>  | rhamnosyltransferase 2                         | 5.5 |
| PA14_10490 |              | hypothetical protein                           | 5.4 |
| PA14_68210 | <i>rmIC</i>  | dTDP-4-dehydrorhamnose 3,5-epimerase           | 5.4 |
| PA14_59390 |              | hypothetical protein                           | 5.3 |
| PA14_30420 |              | tRNA-Ser                                       | 5.3 |
| PA14_21030 |              | ATP-dependent Clp protease proteolytic subunit | 5.3 |
| PA14_09520 | <i>mexI</i>  | RND efflux transporter                         | 5.2 |
| PA14_41330 |              | tRNA-His                                       | 5.2 |
| PA14_55940 |              | hypothetical protein                           | 5.1 |
| PA14_63210 |              | two-component response regulator               | 5.0 |
| PA14_20500 |              | tRNA-Arg                                       | 4.9 |
| PA14_27330 |              | phospho-2-dehydro-3-deoxyheptonate aldolase    | 4.9 |
| PA14_16720 |              | hypothetical protein                           | 4.9 |
| PA14_34750 |              | taurine catabolism dioxygenase                 | 4.9 |
| PA14_15400 |              | replication protein, RepC                      | 4.9 |
| PA14_23570 |              | tRNA-Ala                                       | 4.9 |
| PA14_49130 | <i>dctA</i>  | C4-dicarboxylate transporter DctA              | 4.8 |
| PA14_20020 | <i>hasAp</i> | heme acquisition protein HasAp                 | 4.7 |
| PA14_15360 |              | hypothetical protein                           | 4.7 |
| PA14_56590 |              | hypothetical protein                           | 4.6 |
| PA14_15460 | <i>merA</i>  | mercuric reductase                             | 4.6 |
| PA14_48040 | <i>aprI</i>  | alkaline proteinase inhibitor AprI             | 4.5 |
| PA14_27190 |              | tRNA-Ser                                       | 4.5 |
| PA14_61040 | <i>katB</i>  | catalase                                       | 4.4 |
| PA14_68190 | <i>rmID</i>  | dTDP-4-dehydrorhamnose reductase               | 4.3 |
| PA14_11130 |              | short chain dehydrogenase                      | 4.3 |
| PA14_36330 | <i>hcnA</i>  | hydrogen cyanide synthase HcnA                 | 4.3 |
| PA14_31350 |              | hypothetical protein                           | 4.2 |
| PA14_41340 |              | tRNA-Arg                                       | 4.2 |
| PA14_36320 | <i>hcnB</i>  | hydrogen cyanide synthase HcnB                 | 4.2 |
| PA14_52560 |              | tRNA-Ser                                       | 4.1 |
| PA14_09500 | <i>opmD</i>  | outer membrane protein                         | 4.0 |
| PA14_19110 | <i>rhIB</i>  | rhamnosyltransferase chain B                   | 4.0 |
| PA14_61830 |              | tRNA-Met                                       | 4.0 |
| PA14_26980 |              | hypothetical protein                           | 3.9 |
| PA14_34780 |              | ABC transporter ATP-binding protein            | 3.9 |
| PA14_09470 | <i>phzB1</i> | phenazine biosynthesis protein                 | 3.9 |
| PA14_60160 |              | tRNA-Pro                                       | 3.9 |
| PA14_06875 |              | rsmYregulatoryRNA                              | 3.9 |
| PA14_18680 |              | hypothetical protein                           | 3.9 |
| PA14_03410 |              | tRNA-Arg                                       | 3.8 |
| PA14_15590 |              | hypothetical protein                           | 3.8 |
| PA14_13460 |              | RNA polymerase sigma factor                    | 3.8 |
| PA14_39960 | <i>phzB2</i> | phenazine biosynthesis protein                 | 3.8 |
| PA14_43040 |              | hypothetical protein                           | 3.8 |
| PA14_02500 | <i>exbB1</i> | transport protein ExbB                         | 3.8 |
| PA14_61060 |              | oxidoreductase                                 | 3.6 |
| PA14_62390 |              | hypothetical protein                           | 3.6 |

|            |              |                                             |     |
|------------|--------------|---------------------------------------------|-----|
| PA14_15510 | <i>traJ</i>  | conjugal transfer relaxosome component TraJ | 3.6 |
| PA14_17980 | <i>glpF</i>  | glycerol uptake facilitator protein         | 3.6 |
| PA14_15500 |              | oriT-binding protein, TraK                  | 3.6 |
| PA14_50740 |              | hypothetical protein                        | 3.6 |
| PA14_45950 | <i>rsaL</i>  | regulatory protein RsaL                     | 3.5 |
| PA14_15450 | <i>merD</i>  | transcriptional regulator MerD              | 3.5 |
| PA14_19540 |              | hypothetical protein                        | 3.5 |
| PA14_48140 |              | hypothetical protein                        | 3.5 |
| PA14_40860 |              | hypothetical protein                        | 3.4 |
| PA14_03490 |              | hypothetical protein                        | 3.4 |
| PA14_33290 |              | hypothetical protein                        | 3.3 |
| PA14_15490 |              | hypothetical protein                        | 3.3 |
| PA14_68170 | <i>rmIB</i>  | dTDP-D-glucose 4,6-dehydratase              | 3.3 |
| PA14_00640 | <i>phzH</i>  | potential phenazine-modifying enzyme        | 3.3 |
| PA14_62860 | <i>ftsH</i>  | cell division protein FtsH                  | 3.3 |
| PA14_55580 | <i>nemO</i>  | heme oxygenase                              | 3.3 |
| PA14_69200 | <i>trxA</i>  | thioredoxin                                 | 3.3 |
| PA14_35160 |              | hypothetical protein                        | 3.3 |
| PA14_31170 |              | hypothetical protein                        | 3.3 |
| PA14_72060 |              | hypothetical protein                        | 3.3 |
| PA14_66460 |              | hypothetical protein                        | 3.2 |
| PA14_14570 |              | tRNA-Leu                                    | 3.2 |
| PA14_07470 |              | tRNA-Met                                    | 3.1 |
| PA14_30620 |              | AraC family transcriptional regulator       | 3.1 |
| PA14_38825 | <i>pqqA</i>  | coenzyme PQQ synthesis protein PqqA         | 3.1 |
| PA14_64930 |              | hypothetical protein                        | 3.1 |
| PA14_61760 |              | tRNA-Gln                                    | 3.1 |
| PA14_10350 |              | secretion protein                           | 3.1 |
| PA14_53040 |              | lysozyme inhibitor                          | 3.1 |
| PA14_02510 | <i>exbD1</i> | transport protein ExbD                      | 3.0 |
| PA14_19530 |              | NAD(P)H-dependent FMN reductase             | 3.0 |
| PA14_28050 |              | chemotaxis transducer                       | 3.0 |
| PA14_72970 | <i>tonB</i>  | TonB protein                                | 3.0 |
| PA14_62810 | <i>secG</i>  | preprotein translocase subunit SecG         | 2.9 |
| PA14_25180 | <i>psrA</i>  | transcriptional regulator PsrA              | 2.9 |
| PA14_35170 |              | redox-sensing activator of soxS             | 2.9 |
| PA14_08670 |              | tRNA-Thr                                    | 2.9 |
| PA14_66550 | <i>hemE</i>  | uroporphyrinogen decarboxylase              | 2.9 |
| PA14_58040 |              | hypothetical protein                        | 2.9 |
| PA14_06750 | <i>nirS</i>  | nitrite reductase                           | 2.9 |
| PA14_41210 | <i>hupB</i>  | DNA-binding protein HU                      | 2.9 |
| PA14_00790 | <i>prlC</i>  | oligopeptidase A                            | 2.8 |
| PA14_68930 |              | permease                                    | 2.8 |
| PA14_62720 | <i>rpsO</i>  | 30S ribosomal protein S15                   | 2.8 |
| PA14_34730 |              | XRE family transcriptional regulator        | 2.8 |
| PA14_57030 | <i>fxsA</i>  | FxsA protein                                | 2.8 |
| PA14_64500 |              | transcriptional regulator                   | 2.8 |
| PA14_09490 | <i>phzM</i>  | phenazine-specific methyltransferase        | 2.8 |
| PA14_53160 |              | hypothetical protein                        | 2.8 |
| PA14_32520 |              | hypothetical protein                        | 2.8 |
| PA14_14710 |              | Rrf2 family protein                         | 2.8 |
| PA14_06770 | <i>nirQ</i>  | regulatory protein NirQ                     | 2.7 |
| PA14_12970 | <i>tauD</i>  | taurine dioxygenase                         | 2.7 |
| PA14_23980 | <i>xcpP</i>  | secretion protein XcpP                      | 2.7 |
| PA14_24860 | <i>snr1</i>  | cytochrome c Snr1                           | 2.7 |
| PA14_43050 |              | hypothetical protein                        | 2.7 |

|            |             |                                                                                             |     |
|------------|-------------|---------------------------------------------------------------------------------------------|-----|
| PA14_38550 | <i>maiA</i> | maleylacetoacetate isomerase                                                                | 2.7 |
| PA14_34770 |             | ABC transporter substrate-binding protein                                                   | 2.7 |
| PA14_30410 |             | hypothetical protein                                                                        | 2.7 |
| PA14_19490 |             | antioxidant protein                                                                         | 2.6 |
| PA14_26780 |             | hypothetical protein                                                                        | 2.6 |
| PA14_39800 |             | ECF subfamily RNA polymerase sigma-70 factor<br>CDP-diacylglycerol--glycerol-3-phosphate 3- | 2.6 |
| PA14_30670 | <i>pgsA</i> | phosphatidyltransferase                                                                     | 2.6 |
| PA14_10330 |             | outer membrane protein                                                                      | 2.6 |
| PA14_06180 |             | RNA polymerase sigma factor                                                                 | 2.6 |
| PA14_12920 |             | taurine ABC transporter periplasmic protein                                                 | 2.6 |
| PA14_28620 |             | hypothetical protein                                                                        | 2.6 |
| PA14_60030 |             | hypothetical protein                                                                        | 2.6 |
| PA14_40260 |             | hypothetical protein                                                                        | 2.6 |
| PA14_39780 |             | hypothetical protein                                                                        | 2.6 |
| PA14_36820 |             | hypothetical protein                                                                        | 2.6 |
| PA14_71900 |             | hypothetical protein                                                                        | 2.5 |
| PA14_34460 |             | hypothetical protein                                                                        | 2.5 |
| PA14_19520 |             | ABC transporter ATP-binding protein                                                         | 2.5 |
| PA14_13210 |             | hypothetical protein                                                                        | 2.5 |
| PA14_09270 | <i>pchE</i> | dihydroaeruginosic acid synthetase                                                          | 2.5 |
| PA14_08660 |             | tRNA-Gly                                                                                    | 2.5 |
| PA14_06130 |             | hypothetical protein                                                                        | 2.5 |
| PA14_05020 |             | hypothetical protein                                                                        | 2.5 |
| PA14_62800 |             | tRNA-Leu                                                                                    | 2.5 |
| PA14_31370 |             | hypothetical protein                                                                        | 2.5 |
| PA14_15370 |             | hypothetical protein                                                                        | 2.5 |
| PA14_60750 | <i>pra</i>  | protein activator                                                                           | 2.5 |
| PA14_37470 |             | flavin-dependent oxidoreductase                                                             | 2.5 |
| PA14_03080 |             | acetyltransferase                                                                           | 2.4 |
| PA14_06580 |             | hypothetical protein                                                                        | 2.4 |
| PA14_37990 |             | RNA polymerase sigma factor                                                                 | 2.4 |
| PA14_68200 | <i>rmlA</i> | glucose-1-phosphate thymidyltransferase                                                     | 2.4 |
| PA14_30550 |             | periplasmic aliphatic sulfonate-binding protein                                             | 2.4 |
| PA14_12130 | <i>lis</i>  | lipoyl synthase                                                                             | 2.4 |
| PA14_58580 |             | hydroxylase                                                                                 | 2.4 |
| PA14_15110 |             | hypothetical protein                                                                        | 2.4 |
| PA14_11010 |             | hypothetical protein                                                                        | 2.4 |
| PA14_00800 |             | hypothetical protein                                                                        | 2.4 |
| PA14_18070 |             | periplasmic metal-binding protein                                                           | 2.3 |
| PA14_41930 |             | hypothetical protein                                                                        | 2.3 |
| PA14_28250 |             | secreted acid phosphatase                                                                   | 2.3 |
| PA14_09370 |             | hypothetical protein                                                                        | 2.3 |
| PA14_10560 |             | hypothetical protein                                                                        | 2.3 |
| PA14_10500 |             | cbb3-type cytochrome c oxidase subunit I                                                    | 2.3 |
| PA14_31700 |             | CDP-alcohol phosphatidyltransferase                                                         | 2.3 |
| PA14_72870 |             | aminotransferase                                                                            | 2.3 |
| PA14_21260 |             | hypothetical protein                                                                        | 2.3 |
| PA14_22880 |             | Fe-S protein                                                                                | 2.3 |
| PA14_26190 |             | hypothetical protein                                                                        | 2.3 |
| PA14_23090 |             | keto-hydroxyglutarate-aldolase/keto-deoxy-<br>phosphogluconate aldolase                     | 2.3 |
| PA14_37440 |             | MFS transporter                                                                             | 2.3 |
| PA14_52250 |             | two-component response regulator                                                            | 2.3 |
| PA14_08690 |             | tRNA-Trp                                                                                    | 2.2 |
| PA14_13140 |             | hypothetical protein                                                                        | 2.2 |

|            |               |                                                    |     |
|------------|---------------|----------------------------------------------------|-----|
| PA14_16110 |               | hypothetical protein                               | 2.2 |
| PA14_63460 |               | tRNA-Sec                                           | 2.2 |
| PA14_20770 |               | hypothetical protein                               | 2.2 |
| PA14_28740 |               | tRNA-Pro                                           | 2.2 |
| PA14_40510 | <i>ccoN-2</i> | cbb3-type cytochrome c oxidase subunit I           | 2.2 |
| PA14_60540 |               | hypothetical protein                               | 2.2 |
| PA14_38060 |               | hypothetical protein                               | 2.2 |
| PA14_35340 |               | 2-ketogluconate kinase                             | 2.2 |
| PA14_39970 | <i>phzA2</i>  | phenazine biosynthesis protein                     | 2.2 |
| PA14_72550 |               | adhesin                                            | 2.2 |
| PA14_42200 |               | hypothetical protein                               | 2.2 |
| PA14_68030 |               | tRNA-Phe                                           | 2.2 |
| PA14_33750 |               | outer membrane protein                             | 2.2 |
| PA14_56910 |               | hypothetical protein                               | 2.2 |
| PA14_41450 |               | hypothetical protein                               | 2.2 |
| PA14_52130 |               | hypothetical protein                               | 2.2 |
| PA14_62870 | <i>rrmJ</i>   | cell division protein FtsJ                         | 2.2 |
| PA14_52690 | <i>aruG</i>   | arginine/ornithine succinyltransferase All subunit | 2.2 |
| PA14_36310 | <i>hcnC</i>   | hydrogen cyanide synthase HcnC                     | 2.2 |
| PA14_49800 |               | oxidoreductase                                     | 2.2 |
| PA14_34820 |               | regulatory protein                                 | 2.1 |
| PA14_43520 |               | hypothetical protein                               | 2.1 |
| PA14_38220 |               | hypothetical protein                               | 2.1 |
| PA14_15570 |               | hypothetical protein                               | 2.1 |
| PA14_40240 |               | ABC transporter ATP-binding protein/permease       | 2.1 |
| PA14_31050 |               | hypothetical protein                               | 2.1 |
| PA14_47190 | <i>cyoB</i>   | cytochrome o ubiquinol oxidase subunit I           | 2.1 |
| PA14_34830 |               | regulatory protein                                 | 2.1 |
| PA14_14750 |               | iron-binding protein IscA                          | 2.1 |
| PA14_58690 |               | hypothetical protein                               | 2.1 |
| PA14_12940 |               | taurine ABC transporter ATP-binding protein        | 2.1 |
| PA14_68070 |               | periplasmic binding protein                        | 2.1 |
| PA14_19120 | <i>rhIR</i>   | transcriptional regulator RhIR                     | 2.1 |
| PA14_40630 |               | hypothetical protein                               | 2.1 |
| PA14_37770 |               | hydrolase                                          | 2.1 |
| PA14_02530 |               | hypothetical protein                               | 2.1 |
| PA14_64940 |               | hypothetical protein                               | 2.1 |
| PA14_09290 | <i>pchG</i>   | pyochelin biosynthetic protein PchG                | 2.1 |
| PA14_06170 |               | transmembrane sensor                               | 2.0 |
| PA14_48060 | <i>aprA</i>   | alkaline metalloproteinase                         | 2.0 |
| PA14_15540 |               | mating pair formation protein TrbL                 | 2.0 |
| PA14_34510 |               | hypothetical protein                               | 2.0 |
| PA14_65320 | <i>miaA</i>   | tRNA delta(2)-isopentenylpyrophosphate transferase | 2.0 |
| PA14_52700 | <i>aruF</i>   | arginine/ornithine succinyltransferase AI subunit  | 2.0 |
| PA14_13000 |               | transcriptional regulator                          | 2.0 |
| PA14_19370 |               | asparagine synthetase                              | 2.0 |
| PA14_14740 |               | scaffold protein                                   | 2.0 |
| PA14_30630 | <i>pqsH</i>   | FAD-dependent monooxygenase                        | 2.0 |

**Supplemental Table 4. Genes up-regulated by mBTL in the wild-type strain determined through microarray analysis.** The ratio of gene expression in mBTL treated cells to that of untreated cells (fold up-regulation) is displayed for genes that exhibited changes greater than 2-fold. Ratios are the average of three independent experiments.

| Gene locus | Gene name   | Description                               | Ratio |
|------------|-------------|-------------------------------------------|-------|
| PA14_10380 |             | hypothetical protein                      | 2.6   |
| PA14_31290 | <i>pa1L</i> | PA-I galactophilic lectin                 | 2.4   |
| PA14_10370 |             | hypothetical protein                      | 2.3   |
| PA14_61200 |             | hypothetical protein                      | 2.3   |
| PA14_49300 |             | lipxygenase                               | 2.3   |
| PA14_10350 |             | secretion protein                         | 2.2   |
| PA14_31840 |             | hypothetical protein                      | 2.2   |
| PA14_52000 |             | hypothetical protein                      | 2.2   |
| PA14_45310 | <i>ccmF</i> | cytochrome C-type biogenesis protein CcmF | 2.1   |
| PA14_37070 |             | hypothetical protein                      | 2.1   |
| PA14_31280 |             | integrase                                 | 2.1   |
| PA14_31890 |             | RND efflux transporter                    | 2.0   |
| PA14_20640 |             | hypothetical protein                      | 2.0   |



**Supplemental Table 5. Genes down-regulated by mBTL in the *lasR* mutant determined through microarray analysis.** The ratio of gene expression in untreated cells to that of mBTL treated cells (fold down-regulation) is displayed for genes that exhibited changes greater than 2-fold. Ratios are the average of three independent experiments.

| Gene locus | Gene name    | Description                                  | Ratio |
|------------|--------------|----------------------------------------------|-------|
| PA14_33810 | <i>pvdA</i>  | L-ornithine N5-oxygenase                     | 18.4  |
| PA14_09490 | <i>phzM</i>  | phenazine-specific methyltransferase         | 12.8  |
| PA14_33510 |              | hypothetical protein                         | 12.6  |
| PA14_33820 | <i>pvdQ</i>  | penicillin acylase-related protein           | 11.0  |
| PA14_33610 |              | peptide synthase                             | 10.9  |
| PA14_51380 | <i>pqsE</i>  | quinolone signal response protein            | 7.8   |
| PA14_09480 | <i>phzA1</i> | phenazine biosynthesis protein               | 7.7   |
| PA14_51420 | <i>pqsB</i>  | PqsB                                         | 6.7   |
| PA14_09470 | <i>phzB1</i> | phenazine biosynthesis protein               | 6.6   |
| PA14_49720 |              | hypothetical protein                         | 5.7   |
| PA14_33730 |              | dipeptidase                                  | 5.4   |
| PA14_51410 | <i>pqsC</i>  | PqsC                                         | 5.4   |
| PA14_33280 | <i>pvdL</i>  | peptide synthase                             | 5.1   |
| PA14_33650 | <i>pvdD</i>  | pyoverdine synthetase D                      | 4.6   |
| PA14_51430 | <i>pqsA</i>  | coenzyme A ligase                            | 4.5   |
| PA14_36320 | <i>hcnB</i>  | hydrogen cyanide synthase HcnB               | 4.4   |
| PA14_28470 |              | hypothetical protein                         | 4.4   |
| PA14_51390 | <i>pqsD</i>  | 3-oxoacyl-ACP synthase                       | 4.2   |
| PA14_36330 | <i>hcnA</i>  | hydrogen cyanide synthase HcnA               | 4.1   |
| PA14_51350 | <i>phnB</i>  | anthranilate synthase component II           | 4.0   |
| PA14_39970 | <i>phzA2</i> | phenazine biosynthesis protein               | 3.9   |
| PA14_39960 | <i>phzB2</i> | phenazine biosynthesis protein               | 3.9   |
| PA14_33690 | <i>pvdE</i>  | pyoverdine biosynthesis protein PvdE         | 3.8   |
| PA14_09400 | <i>phzS</i>  | hypothetical protein                         | 3.7   |
| PA14_10960 |              | ferredoxin oxidoreductase subunit            | 3.7   |
| PA14_54910 |              | thioesterase                                 | 3.6   |
| PA14_03370 |              | hypothetical protein                         | 3.5   |
| PA14_25640 | <i>plsX</i>  | glycerol-3-phosphate acyltransferase PlsX    | 3.5   |
| PA14_21020 |              | non-ribosomal peptide synthetase             | 3.5   |
| PA14_34490 |              | hypothetical protein                         | 3.5   |
| PA14_29560 |              | hypothetical protein                         | 3.4   |
| PA14_33760 |              | ABC transporter ATP-binding protein/permease | 3.3   |
| PA14_52800 | <i>acsA</i>  | acetyl-CoA synthetase                        | 3.3   |
| PA14_19710 |              | alpha/beta hydrolase                         | 3.3   |
| PA14_53230 |              | oxidoreductase                               | 3.3   |
| PA14_67190 |              | hypothetical protein                         | 3.3   |
| PA14_02970 |              | hypothetical protein                         | 3.2   |
| PA14_33630 | <i>pvdJ</i>  | protein PvdJ                                 | 3.1   |
| PA14_30720 |              | tRNA-Cys                                     | 3.1   |
| PA14_08220 |              | hypothetical protein                         | 3.1   |
| PA14_54870 |              | hypothetical protein                         | 3.0   |
| PA14_55110 |              | hypothetical protein                         | 3.0   |
| PA14_14560 |              | hypothetical protein                         | 3.0   |
| PA14_59410 |              | hypothetical protein                         | 3.0   |
| PA14_29250 |              | hypothetical protein                         | 2.9   |
| PA14_55550 |              | ECF subfamily RNA polymerase sigma-70 factor | 2.9   |
| PA14_68040 |              | short-chain dehydrogenase                    | 2.9   |
| PA14_41800 |              | transcriptional regulator                    | 2.9   |
| PA14_51610 |              | hypothetical protein                         | 2.9   |

|            |              |                                                          |     |
|------------|--------------|----------------------------------------------------------|-----|
| PA14_55360 | <i>exbB2</i> | transport protein ExbB2                                  | 2.9 |
| PA14_51920 |              | acylphosphatase                                          | 2.8 |
| PA14_33270 | <i>pvdG</i>  | protein PvdG                                             | 2.8 |
| PA14_34420 |              | maltose/mannitol ABC transporter substrate-binding prote | 2.8 |
| PA14_69550 |              | hypothetical protein                                     | 2.8 |
| PA14_50050 |              | MFS family transporter                                   | 2.8 |
| PA14_63070 |              | GntR family transcriptional regulator                    | 2.7 |
| PA14_48950 |              | hypothetical protein                                     | 2.7 |
| PA14_18350 |              | bifunctional UDP-glucuronic acid decarboxylase/UDP-4-ε   | 2.7 |
| PA14_32790 |              | hypothetical protein                                     | 2.7 |
| PA14_20330 | <i>phnE</i>  | phosphonate ABC transporter permease                     | 2.7 |
| PA14_35880 |              | gamma-aminobutyraldehyde dehydrogenase                   | 2.7 |
| PA14_33700 | <i>pvdF</i>  | pyoverdine synthetase F                                  | 2.7 |
| PA14_57460 |              | cell division protein MraZ                               | 2.7 |
| PA14_18150 |              | acetyl-coa synthetase                                    | 2.7 |
| PA14_23080 | <i>pgl</i>   | 6-phosphogluconolactonase                                | 2.7 |
| PA14_33250 |              | hypothetical protein                                     | 2.7 |
| PA14_68380 | <i>nudE</i>  | ADP-ribose diphosphatase NudE                            | 2.6 |
| PA14_01600 |              | aldehyde dehydrogenase                                   | 2.6 |
| PA14_41740 |              | hypothetical protein                                     | 2.6 |
| PA14_49010 |              | hypothetical protein                                     | 2.6 |
| PA14_38170 |              | hypothetical protein                                     | 2.6 |
| PA14_09660 |              | acyl-CoA synthetase                                      | 2.6 |
| PA14_19960 |              | hypothetical protein                                     | 2.6 |
| PA14_35950 |              | dehydrogenase                                            | 2.6 |
| PA14_50310 |              | sugar nucleotidyltransferase                             | 2.5 |
| PA14_19750 |              | hypothetical protein                                     | 2.5 |
| PA14_23670 |              | hypothetical protein                                     | 2.5 |
| PA14_63330 |              | glycerolphosphodiesterase                                | 2.5 |
| PA14_42910 |              | hypothetical protein                                     | 2.5 |
| PA14_51850 |              | hypothetical protein                                     | 2.5 |
| PA14_69430 |              | hypothetical protein                                     | 2.5 |
| PA14_59590 |              | hypothetical protein                                     | 2.5 |
| PA14_35390 | <i>pvcD</i>  | pyoverdine biosynthesis protein PvcD                     | 2.5 |
| PA14_38420 |              | hypothetical protein                                     | 2.5 |
| PA14_58900 |              | large exoprotein                                         | 2.5 |
| PA14_57770 | <i>hisC1</i> | histidinol-phosphate aminotransferase                    | 2.4 |
| PA14_33560 |              | adhesion protein                                         | 2.4 |
| PA14_22550 |              | LysR family transcriptional regulator                    | 2.4 |
| PA14_55160 | <i>toxR</i>  | transcriptional regulator ToxR                           | 2.4 |
| PA14_67350 | <i>hutU</i>  | urocanate hydratase                                      | 2.4 |
| PA14_21680 |              | hypothetical protein                                     | 2.4 |
| PA14_47650 | <i>cobS</i>  | cobalamin synthase                                       | 2.4 |
| PA14_33740 | <i>pvdP</i>  | protein PvdP                                             | 2.4 |
| PA14_51050 |              | aldehyde dehydrogenase                                   | 2.4 |
| PA14_52720 | <i>argD</i>  | bifunctional N-succinyldiaminopimelate-aminotransferase  | 2.4 |
| PA14_01250 |              | sulfate transporter                                      | 2.4 |
| PA14_72980 |              | G3E family GTPase                                        | 2.4 |
| PA14_10130 |              | short chain dehydrogenase                                | 2.4 |
| PA14_29390 |              | hypothetical protein                                     | 2.4 |
| PA14_61620 |              | MerR family transcriptional regulator                    | 2.4 |
| PA14_20950 | <i>fabH2</i> | 3-oxoacyl-ACP synthase                                   | 2.4 |
| PA14_05890 |              | stomatin-like protein                                    | 2.3 |
| PA14_54740 |              | hypothetical protein                                     | 2.3 |
| PA14_72960 |              | MFS dicarboxylate transporter                            | 2.3 |
| PA14_36310 | <i>hcnC</i>  | hydrogen cyanide synthase HcnC                           | 2.3 |

|            |             |                                             |     |
|------------|-------------|---------------------------------------------|-----|
| PA14_04030 |             | hypothetical protein                        | 2.3 |
| PA14_61170 |             | transmembrane protein                       | 2.3 |
| PA14_33550 |             | ABC transporter ATP-binding protein         | 2.3 |
| PA14_46170 |             | LysR family transcriptional regulator       | 2.3 |
| PA14_46000 |             | hypothetical protein                        | 2.3 |
| PA14_63605 | <i>fdnG</i> | formate dehydrogenase-O, major subunit      | 2.3 |
| PA14_72230 |             | hypothetical protein                        | 2.3 |
| PA14_35940 |             | acyl-CoA synthetase                         | 2.3 |
| PA14_28630 |             | hydrolase                                   | 2.3 |
| PA14_05430 |             | chemotaxis protein                          | 2.3 |
| PA14_22600 |             | glycosyl transferase family protein         | 2.3 |
| PA14_34320 |             | DszC family monooxygenase                   | 2.3 |
| PA14_51020 |             | hypothetical protein                        | 2.3 |
| PA14_29500 |             | type II secretion system protein            | 2.3 |
| PA14_18880 | <i>nth</i>  | endonuclease III                            | 2.3 |
| PA14_29050 |             | molybdopterin oxidoreductase                | 2.3 |
| PA14_54110 |             | transporter                                 | 2.3 |
| PA14_52900 |             | acyl-CoA dehydrogenase                      | 2.3 |
| PA14_42100 |             | hypothetical protein                        | 2.3 |
| PA14_33720 | <i>pvdN</i> | protein PvdN                                | 2.3 |
| PA14_20130 |             | LysR family transcriptional regulator       | 2.2 |
| PA14_03265 |             | hypothetical protein                        | 2.2 |
| PA14_33240 |             | hypothetical protein                        | 2.2 |
| PA14_73000 |             | hypothetical protein                        | 2.2 |
| PA14_27410 |             | outer membrane protein                      | 2.2 |
| PA14_41020 |             | Orn/Arg/Lys decarboxylase                   | 2.2 |
| PA14_58110 |             | Maf-like protein                            | 2.2 |
| PA14_32650 |             | glutathione S-transferase                   | 2.2 |
| PA14_03250 |             | hypothetical protein                        | 2.2 |
| PA14_27700 |             | transcriptional regulator                   | 2.2 |
| PA14_26810 |             | two-component sensor                        | 2.2 |
| PA14_67540 |             | hypothetical protein                        | 2.2 |
| PA14_31740 |             | hypothetical protein                        | 2.2 |
| PA14_33770 |             | hypothetical protein                        | 2.2 |
| PA14_33570 |             | hypothetical protein                        | 2.2 |
| PA14_03320 |             | hypothetical protein                        | 2.2 |
| PA14_22060 |             | hypothetical protein                        | 2.2 |
| PA14_17260 | <i>dnaE</i> | DNA polymerase III subunit alpha            | 2.2 |
| PA14_03360 |             | hypothetical protein                        | 2.2 |
| PA14_14630 | <i>secD</i> | preprotein translocase subunit SecD         | 2.2 |
| PA14_34250 |             | glycerophosphoryl diester phosphodiesterase | 2.2 |
| PA14_66700 |             | nuclease                                    | 2.2 |
| PA14_53740 |             | hypothetical protein                        | 2.2 |
| PA14_20480 |             | hypothetical protein                        | 2.1 |
| PA14_55390 |             | hypothetical protein                        | 2.1 |
| PA14_34460 |             | hypothetical protein                        | 2.1 |
| PA14_69890 |             | multidrug efflux protein NorA               | 2.1 |
| PA14_43510 |             | hypothetical protein                        | 2.1 |
| PA14_61340 |             | hypothetical protein                        | 2.1 |
| PA14_00560 | <i>exoT</i> | exoenzyme T                                 | 2.1 |
| PA14_33710 | <i>pvdO</i> | protein PvdO                                | 2.1 |
| PA14_13330 |             | hypothetical protein                        | 2.1 |
| PA14_27450 |             | hypothetical protein                        | 2.1 |
| PA14_43100 |             | Rhs family protein                          | 2.1 |
| PA14_72750 |             | hypothetical protein                        | 2.1 |
| PA14_54890 |             | hypothetical protein                        | 2.1 |

|            |             |                                                     |     |
|------------|-------------|-----------------------------------------------------|-----|
| PA14_40900 |             | short-chain dehydrogenase                           | 2.1 |
| PA14_41780 |             | hypothetical protein                                | 2.1 |
| PA14_31770 |             | oxidoreductase                                      | 2.1 |
| PA14_50570 |             | hypothetical protein                                | 2.1 |
| PA14_33580 |             | hypothetical protein                                | 2.1 |
| PA14_45830 |             | hypothetical protein                                | 2.1 |
| PA14_34510 |             | hypothetical protein                                | 2.1 |
| PA14_10600 |             | MFS transporter                                     | 2.1 |
| PA14_08630 |             | pantothenate kinase                                 | 2.1 |
| PA14_26890 | <i>pyrF</i> | orotidine 5'-phosphate decarboxylase                | 2.1 |
| PA14_33540 |             | ABC transporter permease                            | 2.1 |
| PA14_37380 |             | flavin-binding monooxygenase                        | 2.1 |
| PA14_06650 | <i>nirN</i> | c-type cytochrome                                   | 2.1 |
| PA14_28020 |             | hypothetical protein                                | 2.1 |
| PA14_17650 |             | hypothetical protein                                | 2.1 |
| PA14_23640 |             | hypothetical protein                                | 2.1 |
| PA14_46290 |             | TetR family transcriptional regulator               | 2.1 |
| PA14_65390 |             | hypothetical protein                                | 2.1 |
| PA14_68740 | <i>argA</i> | N-acetylglutamate synthase                          | 2.1 |
| PA14_55000 |             | ABC transporter periplasmic protein                 | 2.1 |
| PA14_28660 | <i>infC</i> | translation initiation factor IF-3                  | 2.1 |
| PA14_33530 |             | hypothetical protein                                | 2.1 |
| PA14_51540 |             | transposase                                         | 2.1 |
| PA14_29000 |             | hypothetical protein                                | 2.1 |
| PA14_58980 |             | hypothetical protein                                | 2.1 |
| PA14_55040 |             | ferric enterobactin transporter ATP-binding protein | 2.1 |
| PA14_33500 | <i>pvdH</i> | diaminobutyrate--2-oxoglutarate aminotransferase    | 2.1 |
| PA14_59940 |             | hypothetical protein                                | 2.1 |
| PA14_26610 |             | hypothetical protein                                | 2.1 |
| PA14_59540 |             | hypothetical protein                                | 2.1 |
| PA14_08620 | <i>birA</i> | biotin--protein ligase                              | 2.1 |
| PA14_38020 |             | antibiotic biosynthesis monooxygenase               | 2.1 |
| PA14_06030 |             | acyltransferase                                     | 2.0 |
| PA14_40790 |             | transcriptional regulator                           | 2.0 |
| PA14_28170 |             | formate/nitrate transporter                         | 2.0 |
| PA14_36090 |             | porin                                               | 2.0 |
| PA14_36400 |             | hypothetical protein                                | 2.0 |
| PA14_22350 | <i>actP</i> | acetate permease                                    | 2.0 |
| PA14_63380 |             | hypothetical protein                                | 2.0 |
| PA14_46010 |             | ABC transporter ATP-binding protein                 | 2.0 |
| PA14_44480 |             | hypothetical protein                                | 2.0 |
| PA14_52080 |             | hypothetical protein                                | 2.0 |
| PA14_51360 | <i>phnA</i> | anthranilate synthase component I                   | 2.0 |
| PA14_73100 |             | hypothetical protein                                | 2.0 |
| PA14_26390 |             | hypothetical protein                                | 2.0 |
| PA14_64580 |             | two-component sensor                                | 2.0 |
| PA14_41563 | <i>cobA</i> | uroporphyrin-III C-methyltransferase                | 2.0 |
| PA14_20940 |             | acyl carrier protein                                | 2.0 |
| PA14_26070 |             | hypothetical protein                                | 2.0 |
| PA14_67260 |             | histidine/phenylalanine ammonia-lyase               | 2.0 |

**Supplemental Table 6. Genes down-regulated by mBTL in the *rhIR* mutant determined through microarray analysis.** The ratio of gene expression in untreated cells to that of mBTL treated cells (fold down-regulation) is displayed for genes that exhibited changes greater than 2-fold. Ratios are the average of three independent experiments.

| Gene locus | Gene name | Description          | Ratio |
|------------|-----------|----------------------|-------|
| PA14_58970 |           | hypothetical protein | 3.0   |
| PA14_33360 |           | hypothetical protein | 2.2   |
| PA14_52320 |           | tRNA-Met             | 2.0   |
| PA14_62790 |           | tRNA-Met             | 2.0   |

**Supplemental Table 7. Genes up-regulated by mBTL in a *rhII* null strain determined through microarray analysis.** The ratio of gene expression in mBTL treated cells to that of untreated cells (fold up-regulation) is displayed for genes that exhibited changes greater than 2-fold. Additional columns indicate the genes that are down-regulated in the *lasR* and *rhIR* null strains. Ratios are the average of three independent experiments.

| Gene locus | Gene name    | Description                           | Ratio | LasR-regulated | RhIR-regulated |
|------------|--------------|---------------------------------------|-------|----------------|----------------|
| PA14_10360 |              | hypothetical protein                  | 39.5  |                | *              |
| PA14_53250 | <i>cpbD</i>  | chitin-binding protein CbpD           | 10.1  | *              | *              |
| PA14_01710 | <i>ahpC</i>  | alkyl hydroperoxide reductase         | 9.4   | *              | *              |
| PA14_06810 | <i>norC</i>  | nitric-oxide reductase subunit C      | 5.8   | *              | *              |
| PA14_10380 |              | hypothetical protein                  | 4.9   | *              |                |
| PA14_11140 |              | nonribosomal peptide synthetase       | 4.7   |                | *              |
| PA14_28360 |              | hypothetical protein                  | 4.2   |                | *              |
| PA14_66720 | <i>priA</i>  | primosome assembly protein PriA       | 3.9   |                |                |
| PA14_03520 |              | hypothetical protein                  | 3.8   |                | *              |
| PA14_58040 |              | hypothetical protein                  | 3.7   | *              | *              |
| PA14_14710 |              | Rrf2 family protein                   | 3.5   |                | *              |
| PA14_17690 |              | hypothetical protein                  | 3.4   |                |                |
|            |              | bifunctional isocitrate dehydrogenase |       |                |                |
| PA14_46450 | <i>aceK</i>  | kinase/phosphatase                    | 3.3   |                |                |
| PA14_35730 |              | hypothetical protein                  | 3.1   |                |                |
| PA14_22320 |              | hypothetical protein                  | 3.0   | *              | *              |
| PA14_38270 |              | hypothetical protein                  | 3.0   |                | *              |
| PA14_16250 | <i>lasB</i>  | elastase LasB                         | 2.9   | *              | *              |
| PA14_18800 |              | hypothetical protein                  | 2.9   | *              | *              |
| PA14_53290 | <i>trxB2</i> | thioredoxin reductase 2               | 2.9   | *              | *              |
| PA14_19640 |              | short chain dehydrogenase             | 2.8   |                |                |
| PA14_52380 |              | cytochrome b561                       | 2.7   |                |                |
| PA14_33360 |              | hypothetical protein                  | 2.5   |                |                |
| PA14_26990 |              | hypothetical protein                  | 2.5   | *              | *              |
| PA14_40290 | <i>lasA</i>  | LasA protease                         | 2.5   |                | *              |
| PA14_03490 |              | hypothetical protein                  | 2.5   |                | *              |
| PA14_03510 |              | hypothetical protein                  | 2.4   |                | *              |
| PA14_03770 | <i>speB1</i> | agmatinase                            | 2.4   |                |                |
| PA14_06830 | <i>norB</i>  | nitric-oxide reductase subunit B      | 2.3   | *              | *              |
| PA14_44140 |              | hypothetical protein                  | 2.3   |                |                |
| PA14_56110 |              | hypothetical protein                  | 2.3   |                |                |
| PA14_05860 |              | hypothetical protein                  | 2.2   | *              | *              |
| PA14_06990 |              | hypothetical protein                  | 2.2   |                |                |
| PA14_17510 |              | hypothetical protein                  | 2.2   |                |                |
| PA14_64390 | <i>ureC</i>  | urease subunit alpha                  | 2.2   |                |                |
| PA14_01720 | <i>ahpF</i>  | alkyl hydroperoxide reductase         | 2.1   | *              | *              |
| PA14_51830 |              | DNA-binding stress protein            | 2.1   | *              | *              |
| PA14_71840 |              | hypothetical protein                  | 2.1   |                |                |
| PA14_05660 |              | transcriptional regulator             | 2.1   |                |                |
| PA14_60480 |              | hypothetical protein                  | 2.1   |                |                |

|            |                           |     |   |
|------------|---------------------------|-----|---|
| PA14_18860 | hypothetical protein      | 2.0 |   |
| PA14_19210 | hypothetical protein      | 2.0 |   |
| PA14_46420 | short chain dehydrogenase | 2.0 |   |
| PA14_24440 | lipoprotein               | 2.0 |   |
| PA14_14740 | scaffold protein          | 2.0 | * |

## **Supplemental Experimental Procedures:**

### ***Strain Construction***

The region spanning approximately 600 bp upstream of *lasR* and including the start codon (called *lasR'*) and the sequence encoding the C-terminal 6 amino acids of LasR and approximately 600 bp downstream (called '*lasR*') were amplified by PCR. The FRT-*aacC1*-FRT region in pAS03 (33) was amplified using primers that span sequences in *lasR'* or '*lasR*'. The *lasR'*, FRT-*aacC1*-FRT and '*lasR*' PCR products were combined through overlap extension PCR and amplified. The resulting *lasR'*-FRT-*aacC1*-FRT-'*lasR*' product was transformed into *P. aeruginosa* PA14 harboring pUCP18-RedS (34). Gentamicin resistance was selected to yield *lasR::aacC1* in the chromosome. Following excision of the gentamicin resistance gene (35), the *lasR*, *rhIR* double mutant strain was constructed by inserting *rhIR::MAR2xT7* into the *lasR* strain background followed by selection for gentamicin resistance (32). This strategy yielded the *lasR::FRT*, *rhIR::MAR2xT7* strain.

### ***LasR and RhIR Overexpression***

Overnight cultures of *E. coli* BL21-Gold (DE3) carrying the LasR and RhIR overexpression constructs were diluted 1:100 into fresh LB supplemented with antibiotics and grown shaking at 37°C to an OD<sub>600</sub> of 0.4. Autoinducer or antagonist molecules were added at 100 μM and incubated an additional 30 min at 20°C, after which protein production was induced by the addition of 1 mM IPTG for 6 hr at 20°C. Cells were harvested by centrifugation and resuspended in 1 mL of 20 mM Tris (pH 7.5), 0.5 mM EDTA, 300 mM NaCl, 1 mM DTT, and 5% glycerol and 100 μM of the appropriate ligand. Resuspended pellets were sonicated twice for 15 seconds to produce lysates containing all of the cell contents. We refer to this preparation as the whole cell (WC) fraction. The WC fraction was subjected to centrifugation at 4°C at



13,300 RPM for 15 min to remove insoluble material and the membrane fraction (22). The supernatant from this pellet is referred to as the soluble (S) fraction. SDS-PAGE gels (4% stacking and 12% resolving) were used followed by Coomassie blue (BioRad) staining to visualize protein. Contrast was uniformly adjusted for both gels.

### ***Biofilm-Induced Clogging of Microfluidic Flow Cells***

Overnight *P. aeruginosa* PA14 cultures were back-diluted 1:1000 into 800 mL of tryptone broth (1% tryptone in H<sub>2</sub>O) with or without 100 μM mBTL and grown to mid-logarithmic phase (OD<sub>600</sub> = 0.5). These cultures were used to fill 100 mL reservoirs that fed into microfluidic flow channels via Tygon tubing with an inner diameter of 2.4 mm. Similar tubing connected the outlet of the microfluidic channel to a collection dish on an analytical balance controlled via LabVIEW. The elevation of the culture reservoir above the collection dish on the balance set the constant pressure difference that drove the flow through the microfluidic channel. The microfluidic channel is 200 μm wide, 90 μm high, and contains a sequence of 37 bends that mimic corners in porous materials. The weight of the effluent culture was measured as a function of time *t* with measurement intervals of 4 s, and the data were converted into a flow rate  $Q(t)$  via the equation

$$Q(t) = \frac{w(t + \Delta t) - w(t - \Delta t)}{1 \text{ min}} \frac{1}{\text{density}}, \text{ where } \Delta t = 30 \text{ s and the density is assumed to be}$$

that of water, 1 kg/L. To the resulting flow rate time series  $Q(t)$ , the function

$$\frac{Q_0}{\left[1 + \exp\left(\frac{t+T}{\tau/2}\right)\right]}$$

was fitted which yields the measurement of the time until clogging (corresponding to the time at which the flow rate declined to 50% of its baseline value  $Q_0$ ).

## Chemistry Materials and Methods

Unless otherwise stated, reactions were performed in flame-dried glassware fitted with rubber septa under a nitrogen atmosphere and were stirred with Teflon-coated magnetic stirring bars. Liquid reagents and solvents were transferred via syringe using standard Schlenk techniques. Reaction solvents were dried by passage over a column of activated alumina. All other solvents and reagents were used as received unless otherwise noted. Reaction temperatures above 23°C refer to the oil bath temperature, which was controlled by an OptiCHEM temperature modulator. Thin layer chromatography was performed using SiliCycle silica gel 60 F-254 precoated plates (0.25 mm) and visualized by UV irradiation and anisaldehyde, ceric ammonium molybdate, or potassium permanganate stain. Sorbent standard silica gel (particle size 40-63  $\mu\text{m}$ ) was used for flash chromatography.  $^1\text{H}$  and  $^{13}\text{C}$  NMR spectra were recorded on Bruker Avance II (500 MHz for  $^1\text{H}$ ; 125 MHz for  $^{13}\text{C}$ ) spectrometer fitted with either a  $^1\text{H}$ -optimized TCI (H/C/N) cryoprobe or a  $^{13}\text{C}$ -optimized dual C/H cryoprobe. Chemical shifts ( $\delta$ ) are reported in ppm relative to the residual solvent signal ( $\delta = 7.26$  for  $^1\text{H}$  NMR and  $\delta = 77.0$  for  $^{13}\text{C}$  NMR). Data for  $^1\text{H}$  NMR spectra are reported as follows: chemical shift (multiplicity, coupling constants, number of hydrogens). Abbreviations are as follows: s (singlet), d (doublet), t (triplet), m (multiplet). High-resolution mass spectral analysis was performed using an Agilent 1200-series electrospray ionization – time-of-flight (ESI-TOF) mass spectrometer in the positive ESI mode. The following compounds were synthesized as previously described: CL, CTL, mBTL, mCTL (4), itc-13 (3), PD-12 (5).

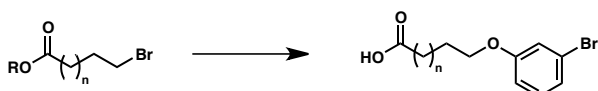

**General Procedure A. Synthesis of acids:** To a flame-dried flask was added the 3-bromophenol (1.0 equiv), the appropriate bromo-ester (1.0 equiv), potassium carbonate (1.2 equiv), and DMF (0.50 M). The reaction was stirred for 3 d or until complete by TLC. After completion, H<sub>2</sub>O was added, and the aqueous layer was extracted 3x with Et<sub>2</sub>O. The combined organic layer was washed 3x with H<sub>2</sub>O and 1x with 1 M NaOH. The solution was dried over Na<sub>2</sub>SO<sub>4</sub>, filtered, and concentrated. The product was purified by column chromatography to remove excess 3-bromophenol if necessary. The resulting ester (1.0 equiv) was added to a solution of sodium hydroxide (5.0 equiv) in 3:1 THF/H<sub>2</sub>O (0.30 M). The reaction was heated to 65°C for 12 hr, or until complete by TLC. The reaction was cooled and acidified with 1 M HCl. The aqueous layer was extracted 3x with EtOAc. The combined organic layer was washed with brine, dried over Na<sub>2</sub>SO<sub>4</sub>, filtered, and concentrated. The product was carried forward crude.

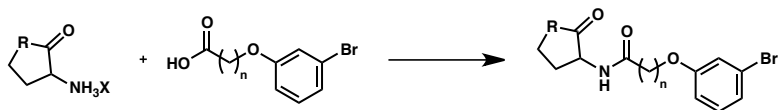

**General Procedure B. Synthesis of amides:** To a flame-dried flask were added the acid (1.0 equiv), *N*-(3-dimethylaminopropyl)-*N'*-ethylcarbodiimide hydrochloride (1.1 equiv), 1-hydroxybenzotriazole (0.25 equiv), triethylamine (2.2 equiv), the appropriate (thio)lactone (1.0 equiv), and CH<sub>2</sub>Cl<sub>2</sub> (0.10 M). After the mixture was stirred at room temperature for 24 hr, H<sub>2</sub>O was added, and the aqueous layer was extracted 3x with EtOAc. The combined organic layer was washed sequentially with 1 M NaHSO<sub>4</sub>, saturated aqueous NaHCO<sub>3</sub>, and brine. The solution was dried over Na<sub>2</sub>SO<sub>4</sub>, filtered, and concentrated. The crude product was purified by column chromatography with a hexanes/EtOAc gradient.

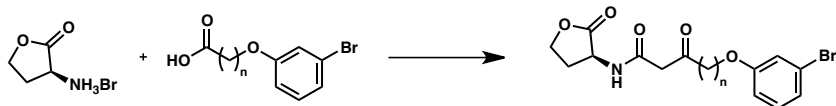

**General Procedure C. Synthesis of  $\beta$ -keto amides:** The acid (1.0 equiv) was combined with  $\text{CH}_2\text{Cl}_2$  (0.5 M) and cooled to  $0^\circ\text{C}$ . *N,N'*-dicyclohexylcarbodiimide (1.0 equiv) was added, and the reaction was stirred at  $0^\circ\text{C}$  for 30 min. Meldrum's acid (1.0 equiv) and 4-(dimethylamino)pyridine (1.0 equiv) were added, and the reaction mixture was stirred at room temperature overnight. The solution was filtered through a Celite plug and concentrated. The residue was dissolved in  $\text{CH}_3\text{CN}$  (0.10 M). After L-homoserine lactone hydrobromide (1.0 equiv) and trifluoroacetic acid (1.0 equiv) were added, the reaction was heated to  $65^\circ\text{C}$  for 4 hr. The reaction mixture was cooled, diluted with EtOAc, and washed sequentially with 1 M  $\text{NaHSO}_4$ , saturated aqueous  $\text{NaHCO}_3$ , and brine. The solution was dried over  $\text{Na}_2\text{SO}_4$ , filtered, and concentrated. The crude product was purified by column chromatography with a hexanes/EtOAc gradient.

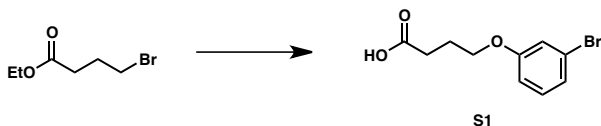

**C4 acid (S1):** Prepared from ethyl 4-bromobutyrate using general procedure A to give **S1** in 90% yield over two steps.  $^1\text{H NMR}$  (500 MHz,  $\text{CDCl}_3$ )  $\delta$  7.16-7.01 (m, 3H), 6.84-6.79 (m, 1H), 4.00 (t,  $J = 6.0$  Hz, 2H), 2.59 (t,  $J = 7.2$  Hz, 2H), 2.16-2.08 (m, 2H);  $^{13}\text{C NMR}$  (125 MHz,  $\text{CDCl}_3$ )  $\delta$  179.1, 159.4, 130.5, 123.9, 122.8, 117.6, 113.4, 66.6, 30.4, 24.2; **HRMS** (ESI-TOF) calculated for  $\text{C}_{10}\text{H}_{12}\text{BrO}_3$   $[\text{M}+\text{H}]^+$ :  $m/z$  258.9971, found 258.9967.

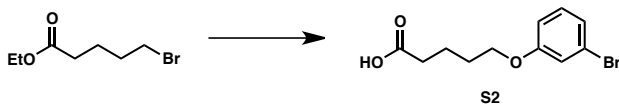

**C5 acid (S2):** Prepared from ethyl 5-bromovalerate using general procedure A to give **S2** in 93% yield over two steps.  $^1\text{H NMR}$  (500 MHz,  $\text{CDCl}_3$ )  $\delta$  7.18-7.01 (m, 3H), 6.85-6.77 (m, 1H), 3.96 (t,  $J = 5.6$  Hz, 2H), 2.50-2.41 (m, 2H), 1.89-1.80 (m, 4H);  $^{13}\text{C NMR}$  (125 MHz,  $\text{CDCl}_3$ )  $\delta$  178.6, 159.6, 130.5, 123.7, 122.8, 117.6, 113.5, 67.5, 33.4, 28.4, 21.3; **HRMS** (ESI-TOF) calculated for  $\text{C}_{11}\text{H}_{14}\text{BrO}_3$   $[\text{M}+\text{H}]^+$ :  $m/z$  273.0127, found 273.0135.

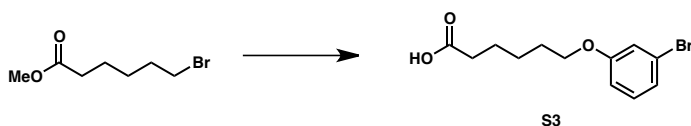

**C6 acid (S3):** Prepared from methyl 6-bromohexanoate using general procedure A to give **S3** in 80% yield over two steps.  $^1\text{H NMR}$  (500 MHz,  $\text{CDCl}_3$ )  $\delta$  7.16-7.01 (m, 3H), 6.85-6.78 (m, 1H), 3.94 (t,  $J = 6.4$  Hz, 2H), 2.40 (t,  $J = 7.4$  Hz, 2H), 1.84-1.76 (m, 2H), 1.76-1.67 (m, 2H), 1.60-1.49 (m, 2H);  $^{13}\text{C NMR}$  (125 MHz,  $\text{CDCl}_3$ )  $\delta$  179.0, 159.7, 130.5, 123.6, 122.8, 117.6, 113.5, 67.8, 33.7, 28.8, 25.5, 24.3; **HRMS** (ESI-TOF) calculated for  $\text{C}_{12}\text{H}_{16}\text{BrO}_3$   $[\text{M}+\text{H}]^+$ :  $m/z$  287.0283, found 287.0277.

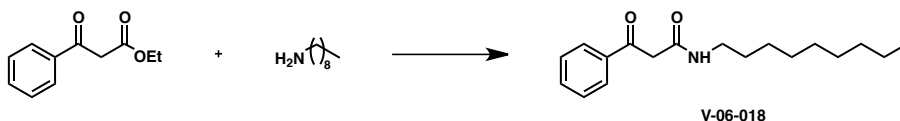

**V-06-018:** Ethyl benzylacetate (0.10 mL, 0.58 mmol, 1.0 equiv) was combined with ethanol (5.8 mL, 10 M). Nonylamine (0.11 mL, 0.58 mmol, 1.0 equiv) was added dropwise, and the mixture was heated to reflux for 6 hr. The reaction mixture was concentrated, and the residue was dissolved in EtOAc. The solution was washed sequentially 2x with 1 M HCl, 1x with brine, then dried over  $\text{Na}_2\text{SO}_4$ , filtered, and concentrated. The crude material was purified by column chromatography (hexanes/EtOAc gradient) to afford 8.3 mg of **V-06-018** in a 5.0% yield.  $^1\text{H NMR}$  (500

MHz, CDCl<sub>3</sub>) δ 8.00 (d, *J* = 7.5 Hz, 2H), 7.62 (t, *J* = 7.4 Hz, 1H), 7.50 (t, *J* = 7.8 Hz, 2H), 7.15 (s, 1H), 3.95 (s, 2H), 3.31-3.27 (m, 2H), 1.55-1.50 (m, 2H), 1.38-1.17 (m, 12H), 0.87 (t, *J* = 6.9 Hz, 3H); <sup>13</sup>C NMR (125 MHz, CDCl<sub>3</sub>) δ 196.4, 165.5, 136.1, 134.1, 128.9, 128.6, 45.2, 39.7, 31.8, 29.5, 29.4, 29.2, 29.2, 26.9, 22.7, 14.1; HRMS (ESI-TOF) calculated for C<sub>18</sub>H<sub>28</sub>NO<sub>2</sub> [M+H]<sup>+</sup>: *m/z* 290.2120, found 290.2120.

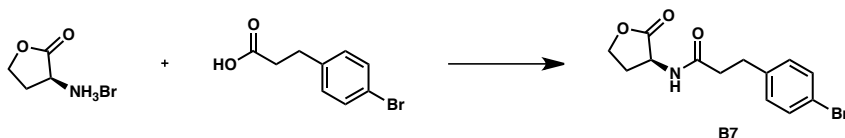

**B7**: Prepared with L-homoserine lactone and 3-(4-bromophenyl)propionic acid using general procedure B to give **B7** in a 52% yield. The spectral data agreed with that reported for **B7** (17). <sup>1</sup>H NMR (500 MHz, CDCl<sub>3</sub>) δ 7.41 (d, *J* = 8.3 Hz, 2H), 7.07 (t, *J* = 9.1 Hz, 2H), 5.86 (s, 1H), 4.57-4.41 (m, 2H), 4.30-4.25 (m, 1H), 2.93 (t, *J* = 7.5 Hz, 2H), 2.89-2.78 (m, 1H), 2.61-2.43 (m, 2H), 2.09-2.00 (m, 1H).; <sup>13</sup>C NMR (125 MHz, CDCl<sub>3</sub>) δ 175.2, 172.2, 139.3, 131.6, 130.1, 120.2, 66.1, 49.3, 37.5, 30.6, 30.6; HRMS (ESI-TOF) calculated for C<sub>13</sub>H<sub>15</sub>BrNO<sub>3</sub> [M+H]<sup>+</sup>: *m/z* 312.0236, found 312.0239.

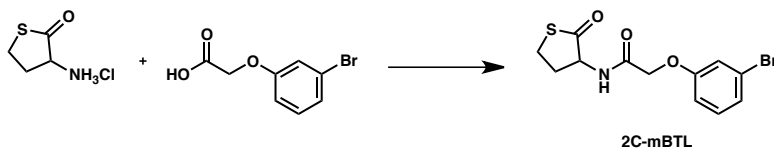

**2C-mBTL**: Prepared with homocysteine thiolactone hydrochloride and (3-bromophenoxy)acetic acid using general procedure B to give **2C-mBTL** in a 50% yield. <sup>1</sup>H NMR (500 MHz, CDCl<sub>3</sub>) δ 7.22-7.09 (m, 3H), 6.95 (s, 1H), 6.89-6.84 (m, 1H), 4.68-4.58 (m, 1H), 4.57-4.46 (m, 2H), 3.44-3.35 (m, 1H), 3.34-3.26 (m, 1H), 3.00-2.91 (m, 1H), 2.08-1.95 (m, 1H); <sup>13</sup>C NMR (125 MHz, CDCl<sub>3</sub>) δ 204.6, 168.1, 157.5, 130.9, 125.5,

123.0, 118.3, 113.4, 67.2, 58.9, 31.6, 27.5; **HRMS** (ESI-TOF) calculated for  $C_{12}H_{13}BrNO_3S$   $[M+H]^+$ :  $m/z$  329.9800, found 329.9830.

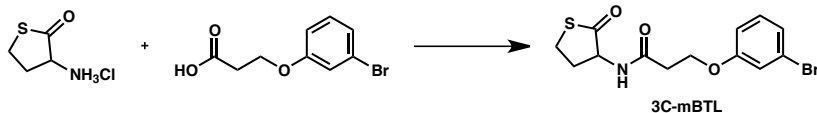

**3C-mBTL**: Prepared with homocysteine thiolactone hydrochloride and 3-(3-bromophenoxy)-propionic acid using general procedure B to give **3C-mBTL** in a 42% yield.  **$^1H$  NMR** (500 MHz,  $CDCl_3$ )  $\delta$  7.21-7.07 (m, 3H), 6.90-6.84 (m, 1H), 6.32 (s, 1H), 4.57-4.49 (m, 1H), 4.30-4.21 (m, 2H), 3.43-3.33 (m, 1H), 3.32-3.24 (m, 1H), 3.04-2.96 (m, 1H), 2.80-2.67 (m, 2H), 2.01-1.87 (m, 1H);  **$^{13}C$  NMR** (125 MHz,  $CDCl_3$ )  $\delta$  205.3, 170.7, 158.9, 130.6, 124.4, 122.8, 117.9, 113.6, 64.0, 59.6, 36.2, 32.0, 27.7; **HRMS** (ESI-TOF) calculated for  $C_{13}H_{15}BrNO_3S$   $[M+H]^+$ :  $m/z$  343.9956, found 343.9984.

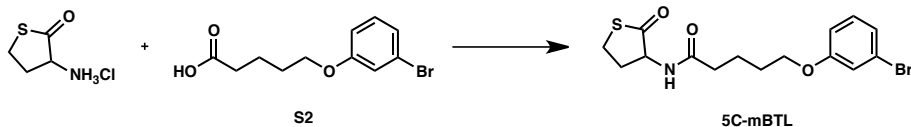

**5C-mBTL**: Prepared with homocysteine thiolactone hydrochloride and **S2** using general procedure B to give **5C-mBTL** in a 68% yield.  **$^1H$  NMR** (500 MHz,  $CDCl_3$ )  $\delta$  7.16-6.99 (m, 3H), 6.85-6.77 (m, 1H), 5.91 (s, 1H), 4.56-4.46 (m, 1H), 3.95 (t,  $J = 5.5$  Hz, 2H), 3.42-3.31 (m, 1H), 3.30-3.22 (m, 1H), 3.01-2.90 (m, 1H), 2.37-2.29 (m, 2H), 1.97-1.78 (m, 5H);  **$^{13}C$  NMR** (125 MHz,  $CDCl_3$ )  $\delta$  205.6, 173.0, 159.6, 130.5, 123.7, 122.8, 117.6, 113.4, 67.6, 59.5, 35.8, 32.1, 28.5, 27.6, 22.1; **HRMS** (ESI-TOF) calculated for  $C_{15}H_{19}BrNO_3S$   $[M+H]^+$ :  $m/z$  372.0269, found 372.0300.

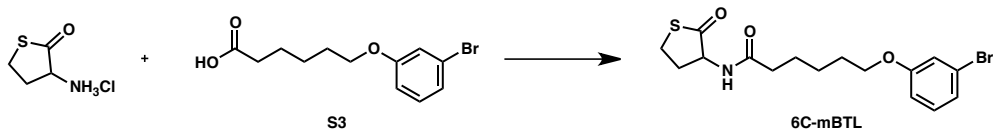

**6C-mBTL**: Prepared with homocysteine thiolactone hydrochloride and **S3** using general procedure B to give **6C-mBTL** in a 74% yield.  $^1\text{H NMR}$  (500 MHz,  $\text{CDCl}_3$ )  $\delta$  7.16-7.00 (m, 3H), 6.85-6.76 (m, 1H), 5.89 (s, 1H), 4.57-4.45 (m, 1H), 3.93 (t,  $J = 6.4$  Hz, 2H), 3.41-3.31 (m, 1H), 3.30-3.20 (m, 1H), 3.03-2.91 (m, 1H), 2.35-2.21 (m, 2H), 1.98-1.83 (m, 1H), 1.83-1.66 (m, 4H), 1.54-1.44 (m, 2H);  $^{13}\text{C NMR}$  (125 MHz,  $\text{CDCl}_3$ )  $\delta$  205.7, 173.3, 159.7, 130.5, 123.6, 122.7, 117.6, 113.4, 67.8, 59.5, 36.2, 32.1, 28.8, 27.6, 25.6, 25.1; **HRMS** (ESI-TOF) calculated for  $\text{C}_{16}\text{H}_{21}\text{BrNO}_3\text{S}$   $[\text{M}+\text{H}]^+$ :  $m/z$  386.0426, found 386.0427.

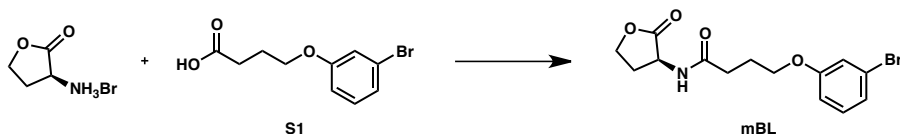

**mBL**: Prepared with L-homoserine lactone hydrobromide and **S1** using general procedure B to give **mBL** in a 62% yield.  $^1\text{H NMR}$  (500 MHz,  $\text{CDCl}_3$ )  $\delta$  7.14-6.98 (m, 3H), 6.83-6.76 (m, 1H), 5.98 (s, 1H), 4.56-4.47 (m, 1H), 4.44 (t,  $J = 9.0$  Hz, 1H), 4.30-4.21 (m, 1H), 3.97 (t,  $J = 5.9$  Hz, 2H), 2.87-2.78 (m, 1H), 2.44 (t,  $J = 6.8$  Hz, 2H), 2.17-2.02 (m, 3H);  $^{13}\text{C NMR}$  (125 MHz,  $\text{CDCl}_3$ )  $\delta$  175.3, 172.7, 159.5, 130.6, 123.9, 122.8, 117.7, 113.4, 66.9, 66.1, 49.3, 32.2, 30.6, 24.7; **HRMS** (ESI-TOF) calculated for  $\text{C}_{14}\text{H}_{17}\text{BrNO}_4$   $[\text{M}+\text{H}]^+$ :  $m/z$  342.0341, found 342.0345.

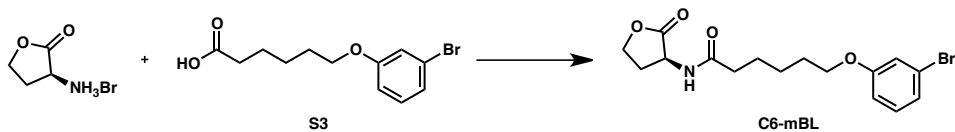



**C6-mBL**: Prepared with L-homoserine lactone hydrobromide and **S3** using general procedure B to give **C6-mBL** in a 61% yield.  $^1\text{H NMR}$  (500 MHz,  $\text{CDCl}_3$ )  $\delta$  7.17-7.01 (m, 3H), 6.85-6.77 (m, 1H), 5.95 (s, 1H), 4.59-4.50 (m, 1H), 4.48 (t,  $J = 9.0$  Hz, 1H), 4.34-4.25 (m, 1H), 3.93 (t,  $J = 6.3$  Hz, 2H), 2.93-2.82 (m, 1H), 2.35-2.23 (m, 2H), 2.19-2.06 (m, 1H), 1.86-1.68 (m, 4H), 1.55-1.46 (m, 2H);  $^{13}\text{C NMR}$  (125 MHz,  $\text{CDCl}_3$ )  $\delta$  175.4, 173.3, 159.7, 130.5, 123.6, 122.8, 117.6, 113.4, 67.7, 66.1, 49.3, 36.0, 30.7, 28.8, 25.6, 25.0; **HRMS** (ESI-TOF) calculated for  $\text{C}_{16}\text{H}_{21}\text{BrNO}_4$   $[\text{M}+\text{H}]^+$ :  $m/z$  370.0654, found 370.0666.

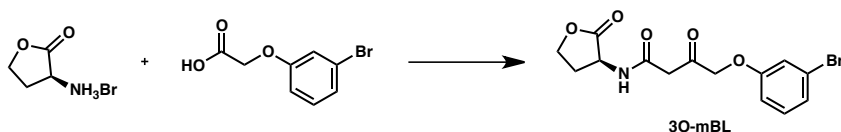

**3O-mBL**: Prepared with L-homoserine lactone hydrobromide and (3-bromophenoxy)acetic acid using general procedure C to give **3O-mBL** in a 46% yield.  $^1\text{H NMR}$  (500 MHz,  $\text{CDCl}_3$ )  $\delta$  7.20-7.03 (m, 3H), 6.87-6.80 (m, 1H), 4.68 (s, 2H), 4.64-4.56 (m, 1H), 4.48 (t,  $J = 8.9$  Hz, 1H), 4.35-4.24 (m, 1H), 3.66 (s, 2H), 2.93-2.88 (m, 1H), 2.81-2.75 (m, 1H), 2.29-2.15 (m, 1H);  $^{13}\text{C NMR}$  (125 MHz,  $\text{CDCl}_3$ )  $\delta$  201.7, 174.8, 165.6, 157.9, 130.9, 125.3, 123.0, 118.0, 113.3, 72.6, 66.0, 49.3, 45.5, 29.9; **HRMS** (ESI-TOF) calculated for  $\text{C}_{14}\text{H}_{15}\text{BrNO}_5$   $[\text{M}+\text{H}]^+$ :  $m/z$  356.0134, found 356.0127.

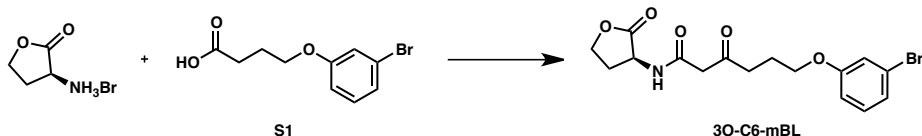

**3O-C6-mBL**: Prepared with L-homoserine lactone hydrobromide and **S1** using general procedure C to give **3O-C6-mBL** in a 34% yield.  $^1\text{H NMR}$  (500 MHz,  $\text{CDCl}_3$ )  $\delta$  7.59 (s, 1H), 7.18-6.99 (m, 3H), 6.85-6.76 (m, 1H), 4.63-4.55 (m, 1H), 4.48 (t,  $J = 8.6$  Hz, 1H), 4.32-4.23 (m, 1H), 3.96 (t,  $J = 5.9$  Hz, 2H), 3.51 (s, 2H), 2.83-2.70 (m, 3H), 2.23-2.15 (m,

1H), 2.14-2.02 (m, 2H); <sup>13</sup>C NMR (125 MHz, CDCl<sub>3</sub>) δ 205.6, 174.7, 166.1, 159.3, 130.6, 124.0, 122.8, 117.6, 113.4, 66.6, 65.9, 49.1, 48.2, 40.1, 29.9, 22.9; HRMS (ESI-TOF) calculated for C<sub>16</sub>H<sub>19</sub>BrNO<sub>5</sub> [M+H]<sup>+</sup>: *m/z* 384.0447, found 384.0455.

**Chiral resolution of mBTL:** mBTL enantiomers were resolved using a Berger Multigram II SFC system equipped with two Varian SD-1 pumps, a Knauer K-2501 multi-wavelength detector set at 220 nm, a Knauer K-1900 pump, a Vatron SGP-50-100 condenser, and using a Chiralpak IC (2 x 15 cm) column. An isocratic method using a mixture of 30% MeOH/CO<sub>2</sub> (100 bar) at 60 mL/min was employed. The two peaks eluted at 1.66 min and 2.13 min. The identity of the enantiomers was determined through comparison of the HPLC trace with that of authentic (S)-mBTL synthesized from L-homocysteine thiolactone hydrochloride. Based on this analysis, peak 1 (>99:1 *er*) is (S)-mBTL and peak 2 (>99:1 *er*) is (R)-mBTL.

#### References:

1. Müh U, Schuster, M., Heim, R., Singh, A., Olson, E. R., Greenberg, E. P. (2006) Novel *Pseudomonas aeruginosa* Quorum-Sensing Inhibitors Identified in an Ultra-High-Throughput Screen. *Antimicrobial Agents and Chemotherapy* 50(11):3674-3679.
2. Geske GD, O'Neill, Jennifer C., Miller, David M., Mattmann, Margrith E., Blackwell, Helen E. (2007) Modulation of Bacterial Quorum Sensing with Synthetic Ligands: Systematic Evaluation of N-Acylated Homoserine Lactones in Multiple Species and New Insights into Their Mechanisms of Action. *Journal of the American Chemical Society* 129(44):13613-13625.
3. Amara N, et.al. (2009) Covalent Inhibition of Bacterial Quorum Sensing. *Journal of the American Chemical Society* 131(30):10610-10619.
4. Swem LR, Swem, D. L., O'Loughlin, C. T., Gatmaitan, R., Zhao, B., Ulrich, S. M., et. al. (2009) A Quorum-Sensing Antagonist Targets Both Membrane-Bound and Cytoplasmic Receptors and Controls Bacterial Pathogenicity. *Molecular Cell* 35(2):143-153.
5. Morkunas B, Galloway, Warren R. J. D., Wright, Megan, Ibbeson, Brett M., Hodgkinson, James T., O'Connell, Kieron M. G., et. al. (2012) Inhibition of the production of the *Pseudomonas aeruginosa* virulence factor pyocyanin in wild-type cells by quorum sensing autoinducer-mimics. *Organic & Biomolecular Chemistry* 10(42):8452-8464.

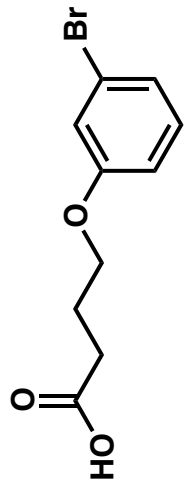

S1

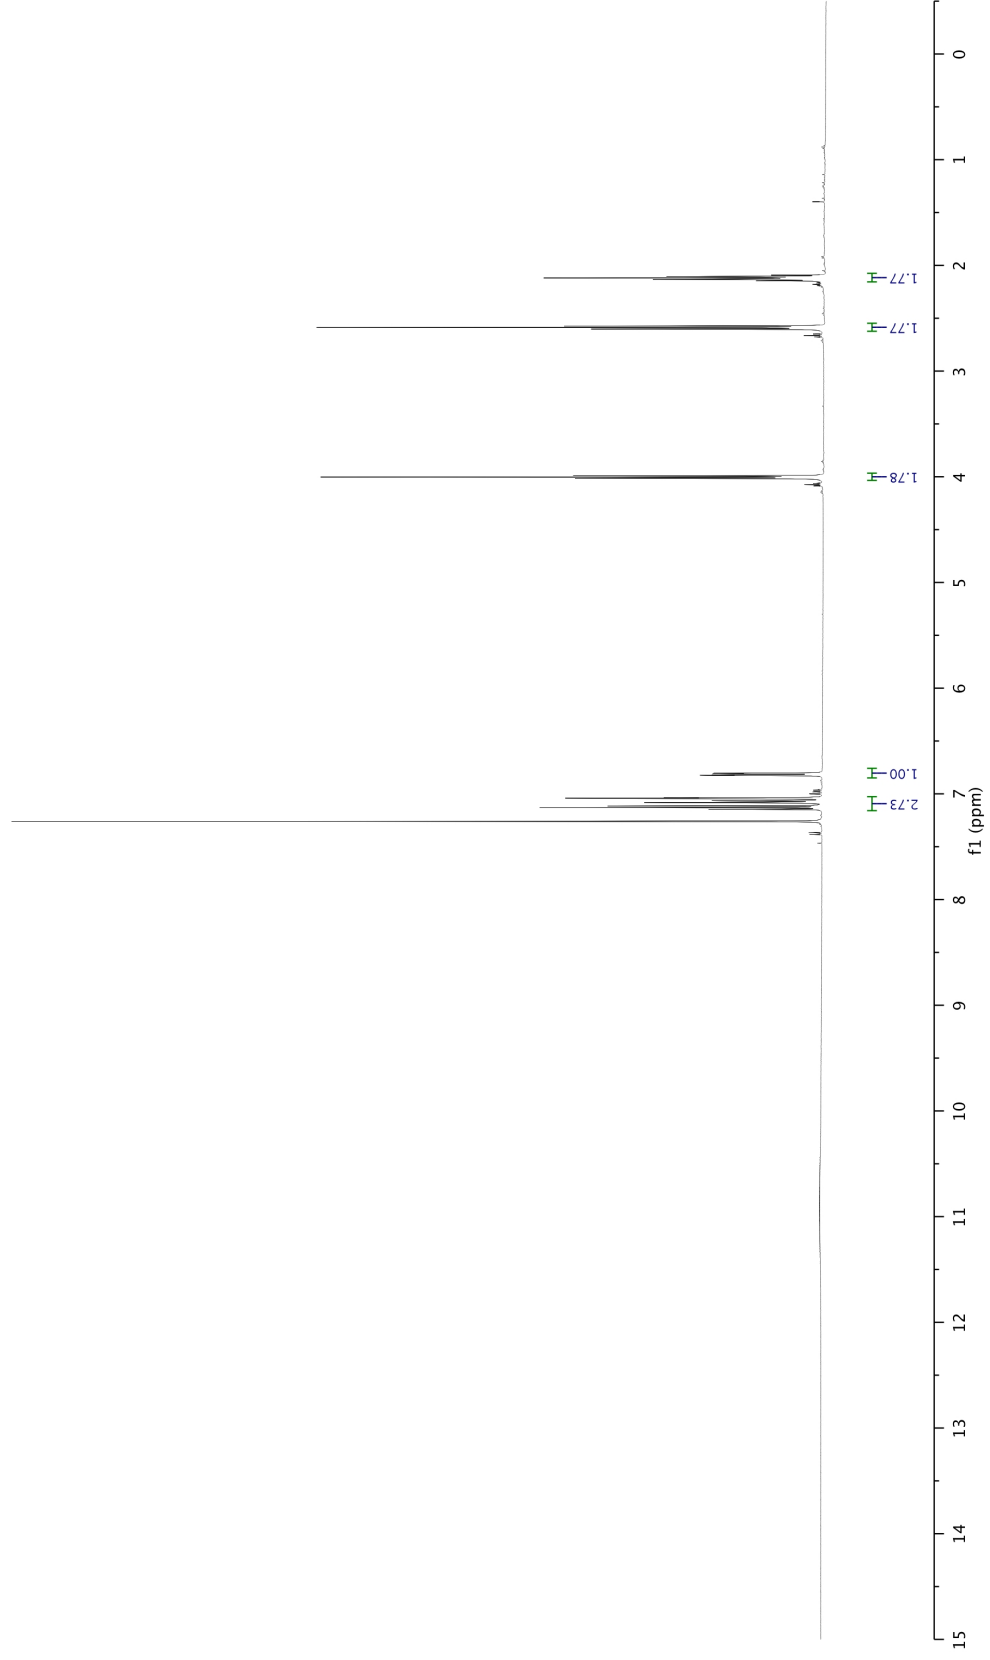

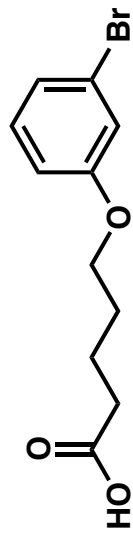

S2

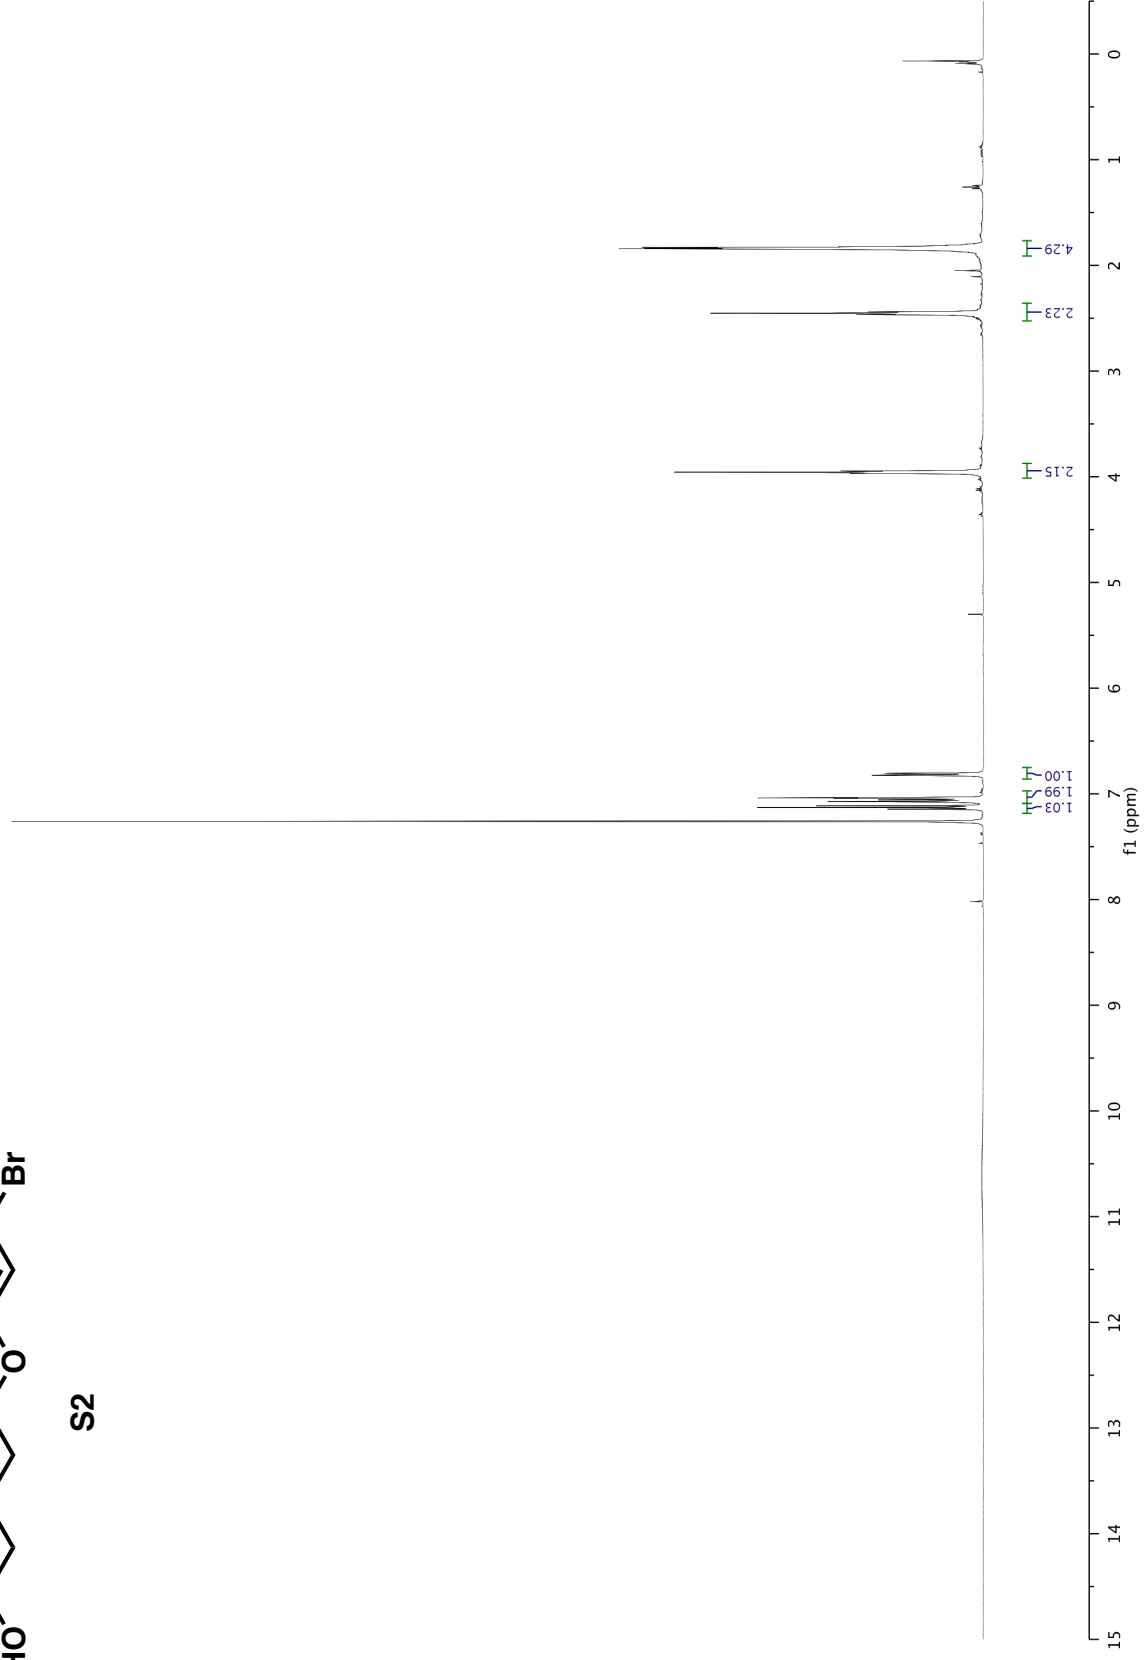

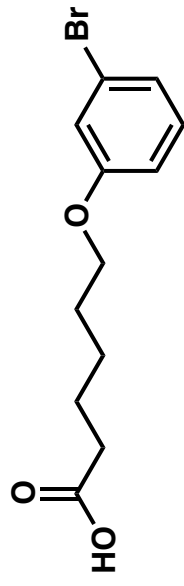

S3

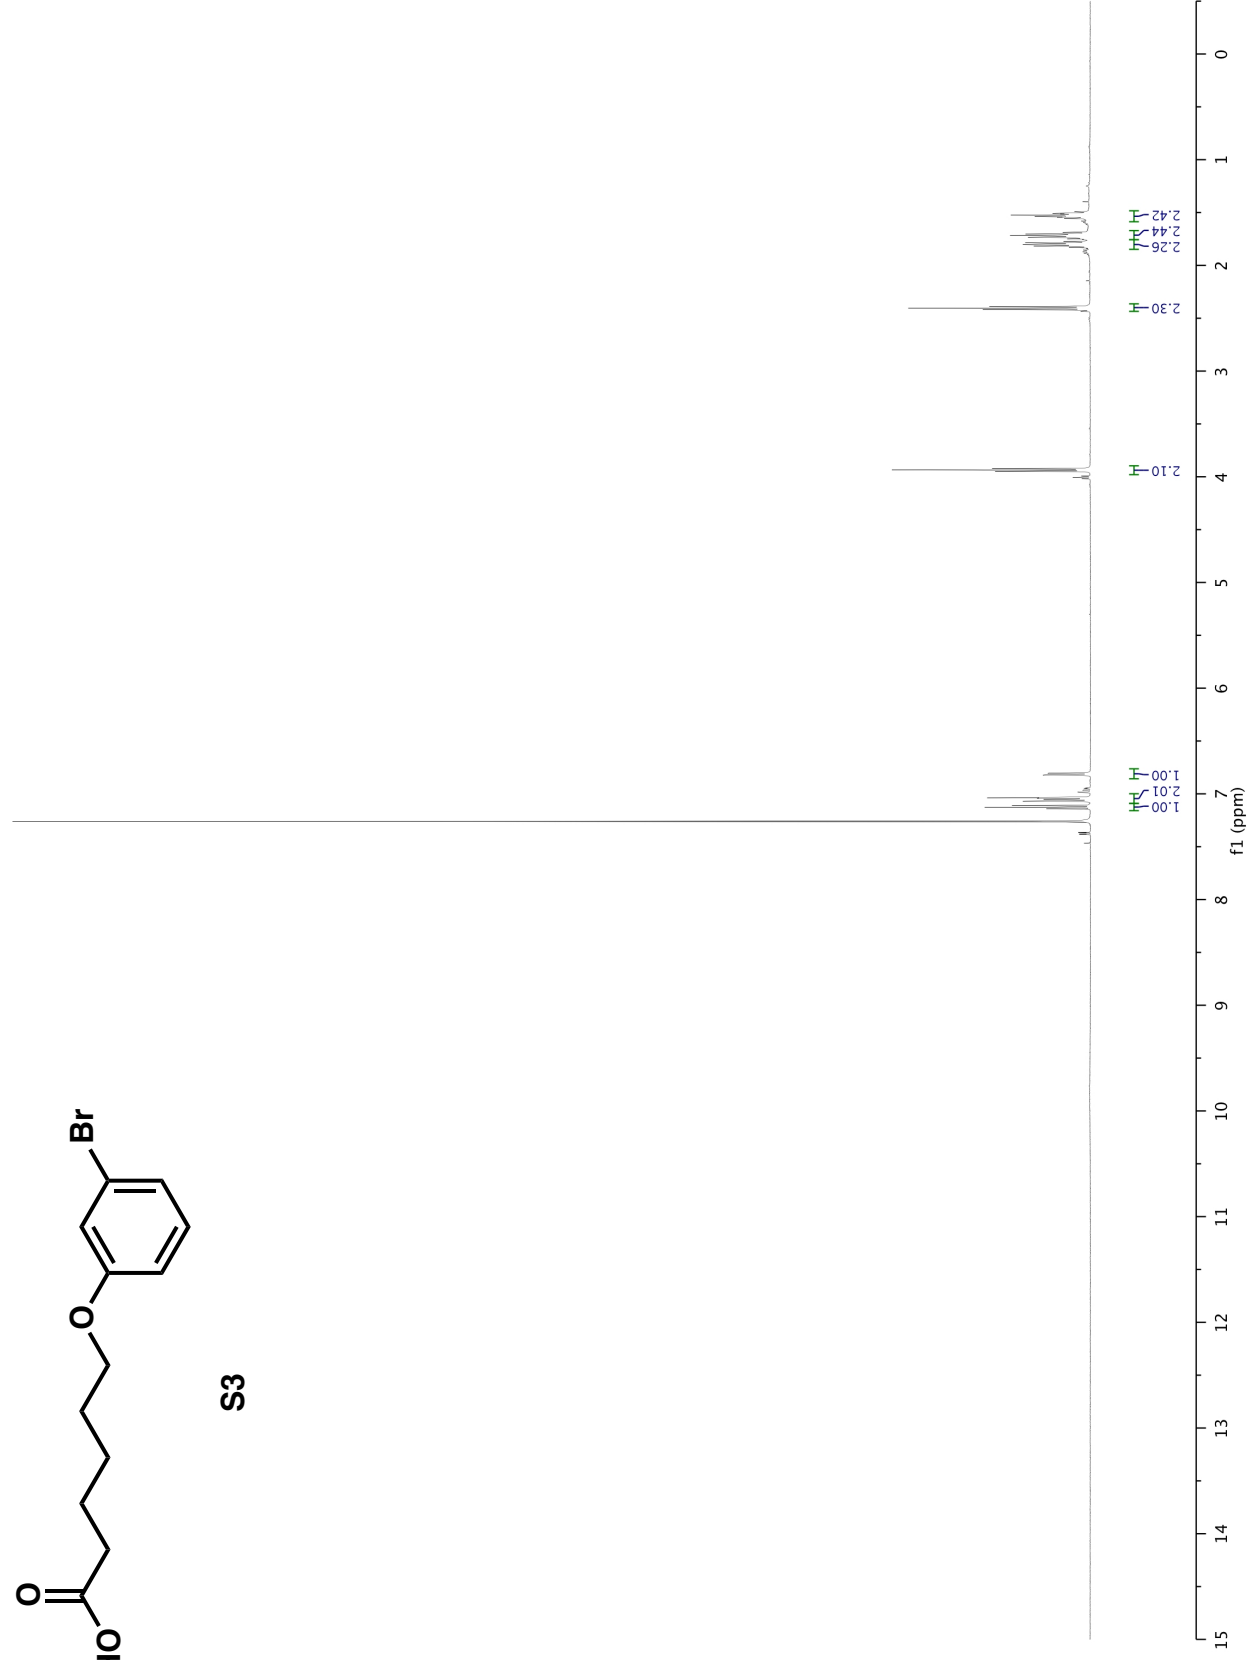

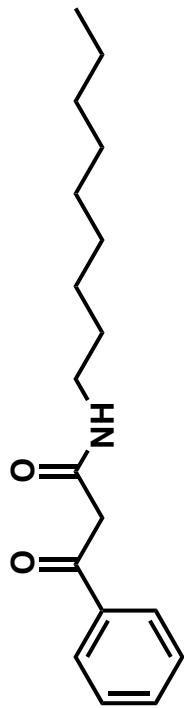

V-06-018

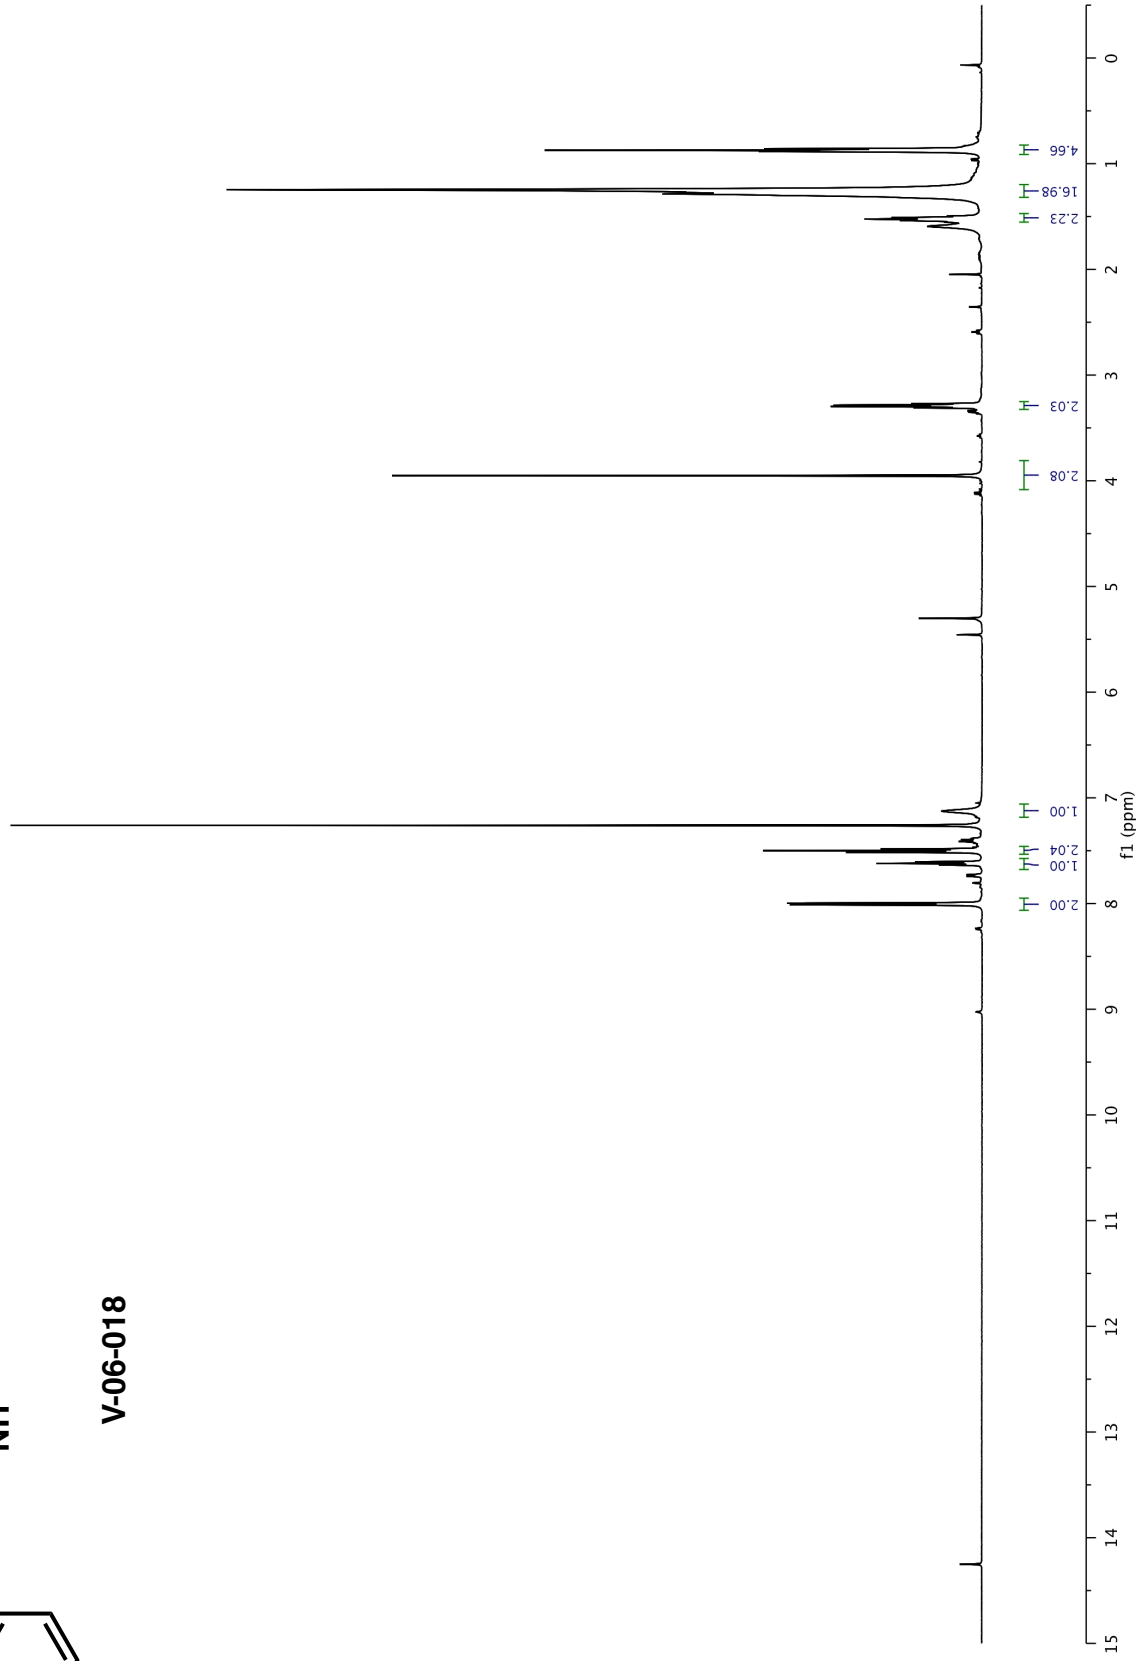

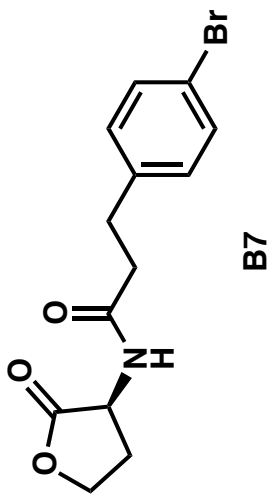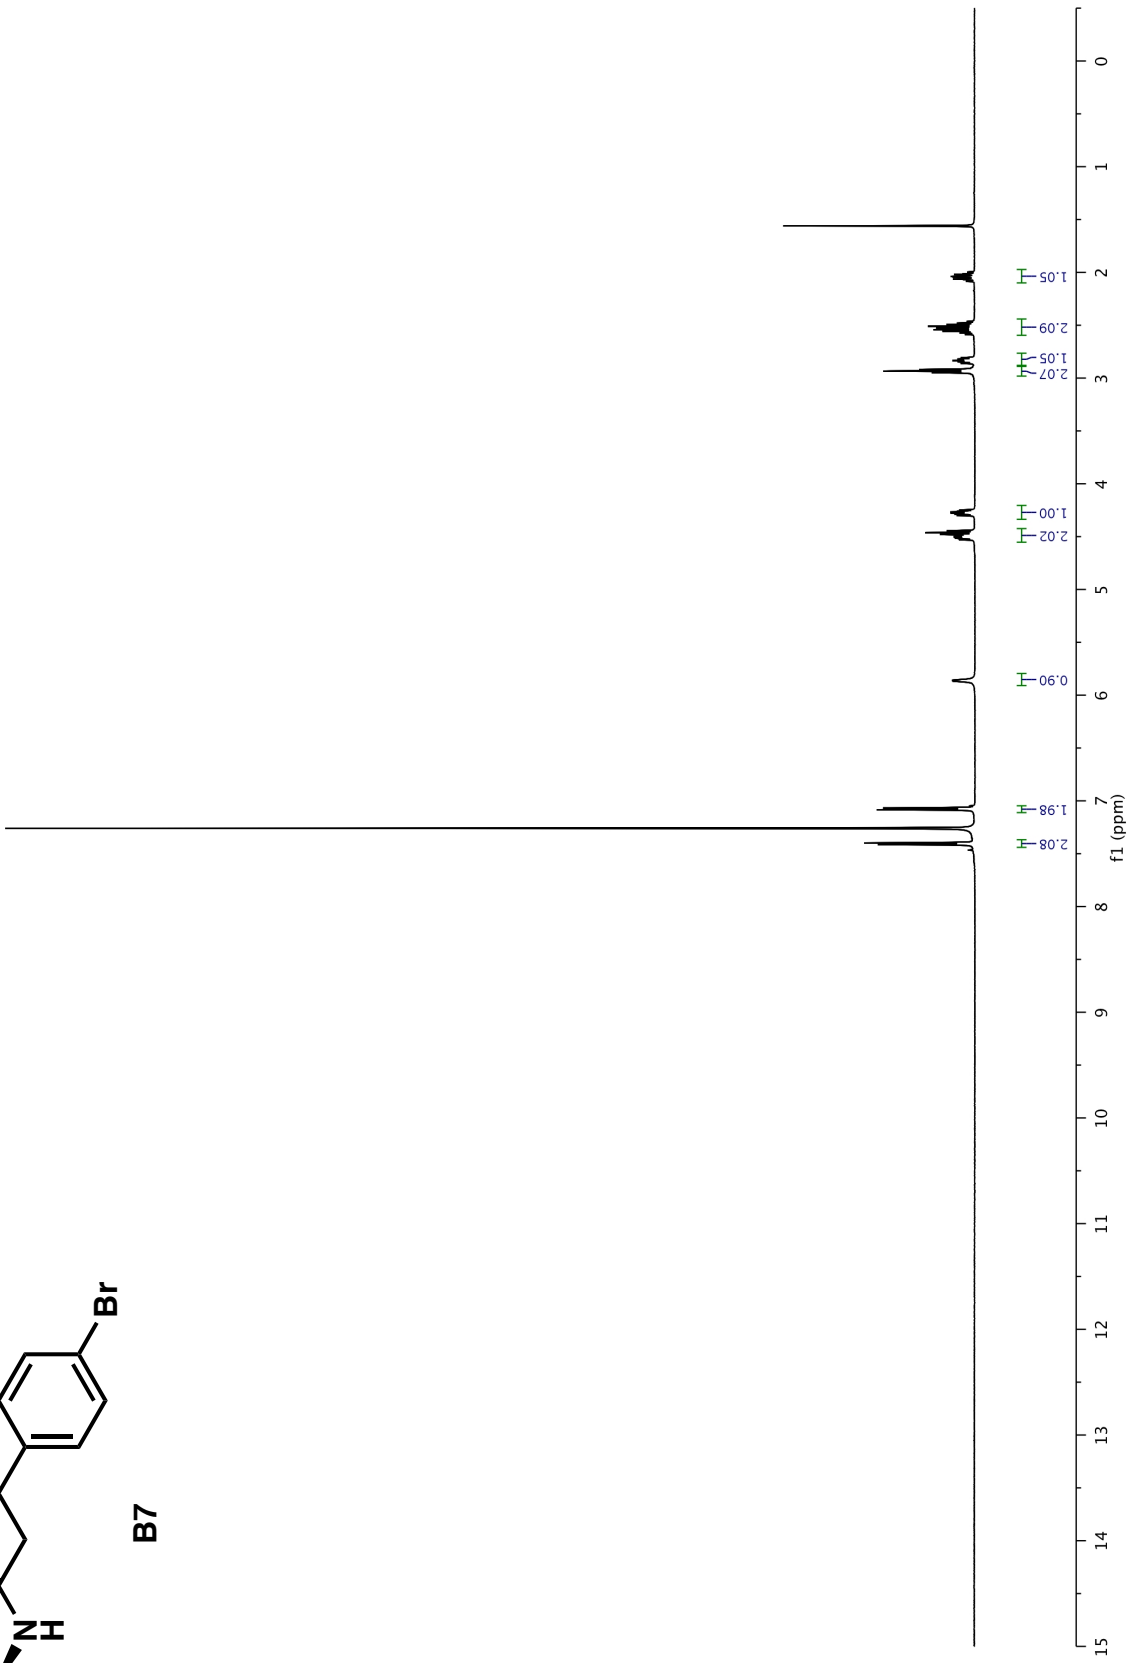

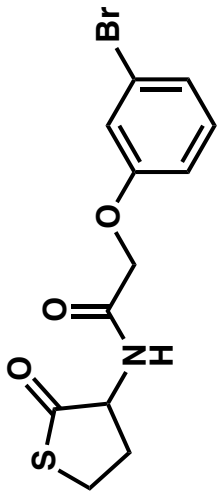

2C-mBTL

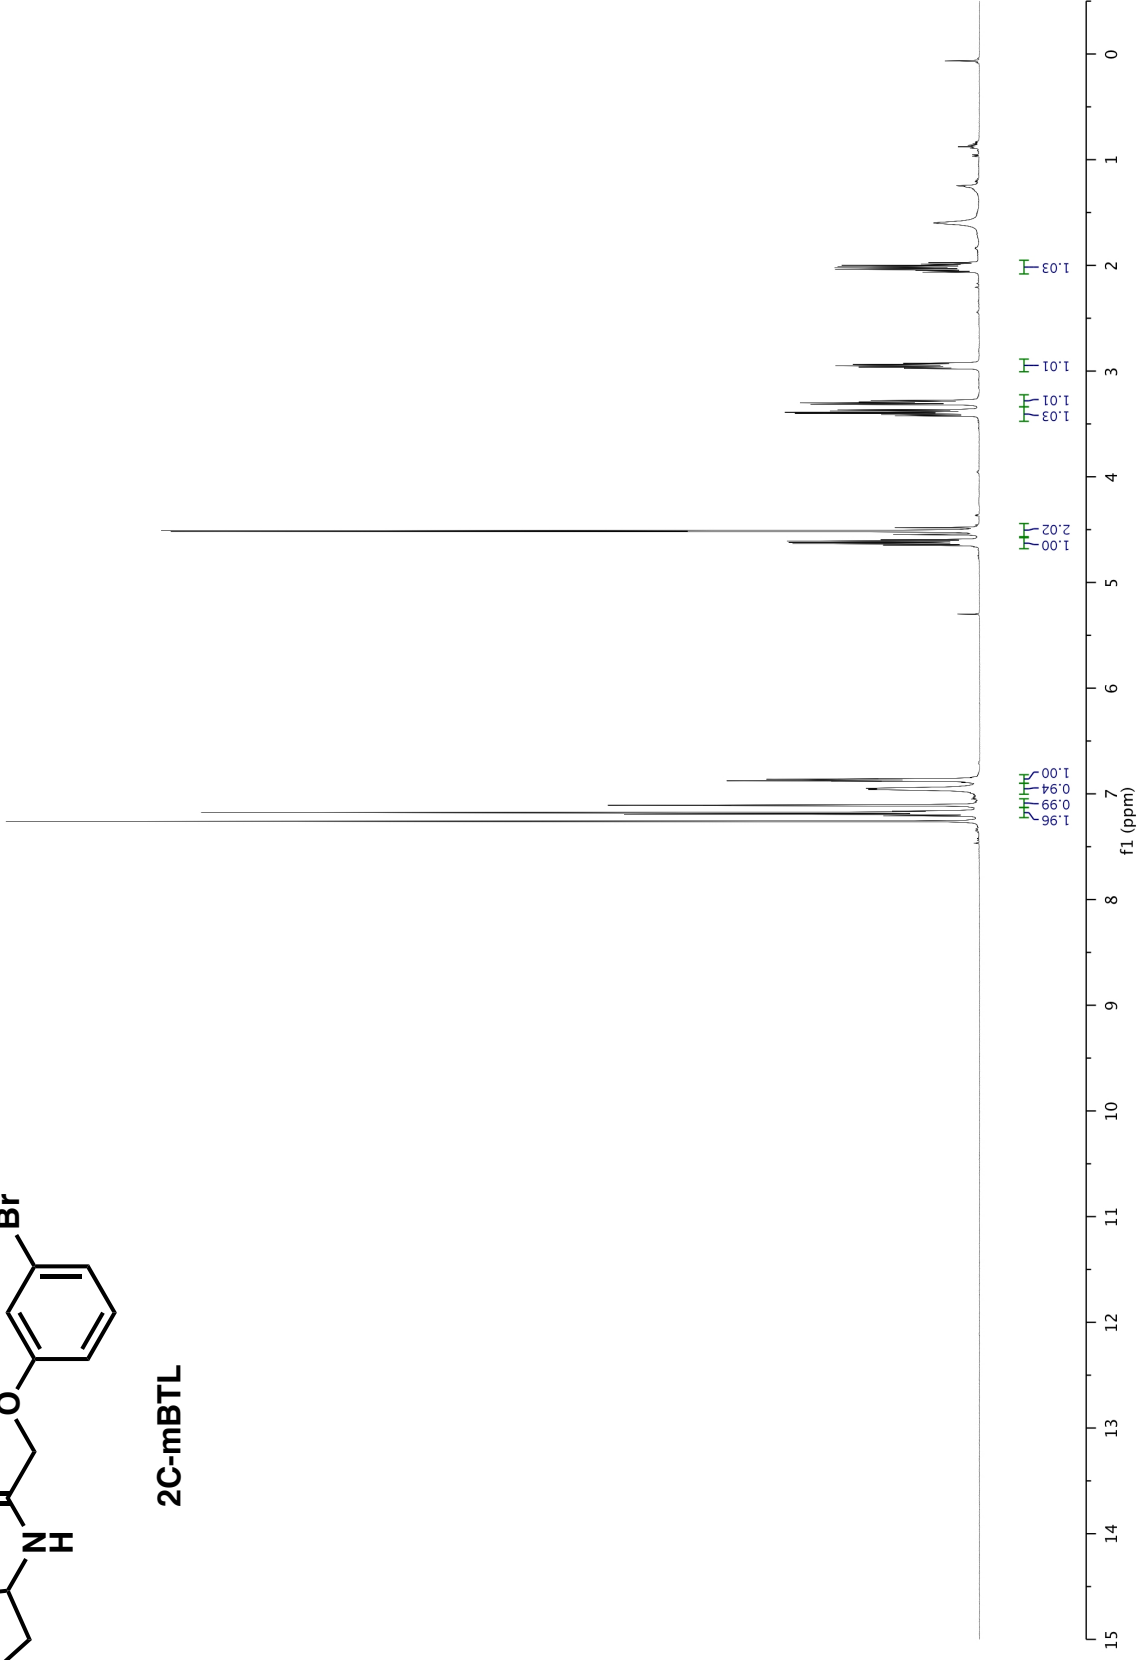



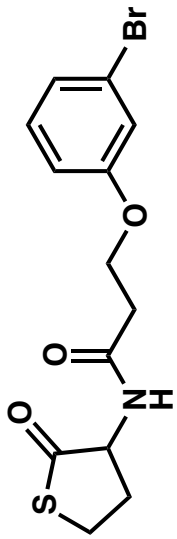

3C-mBTL

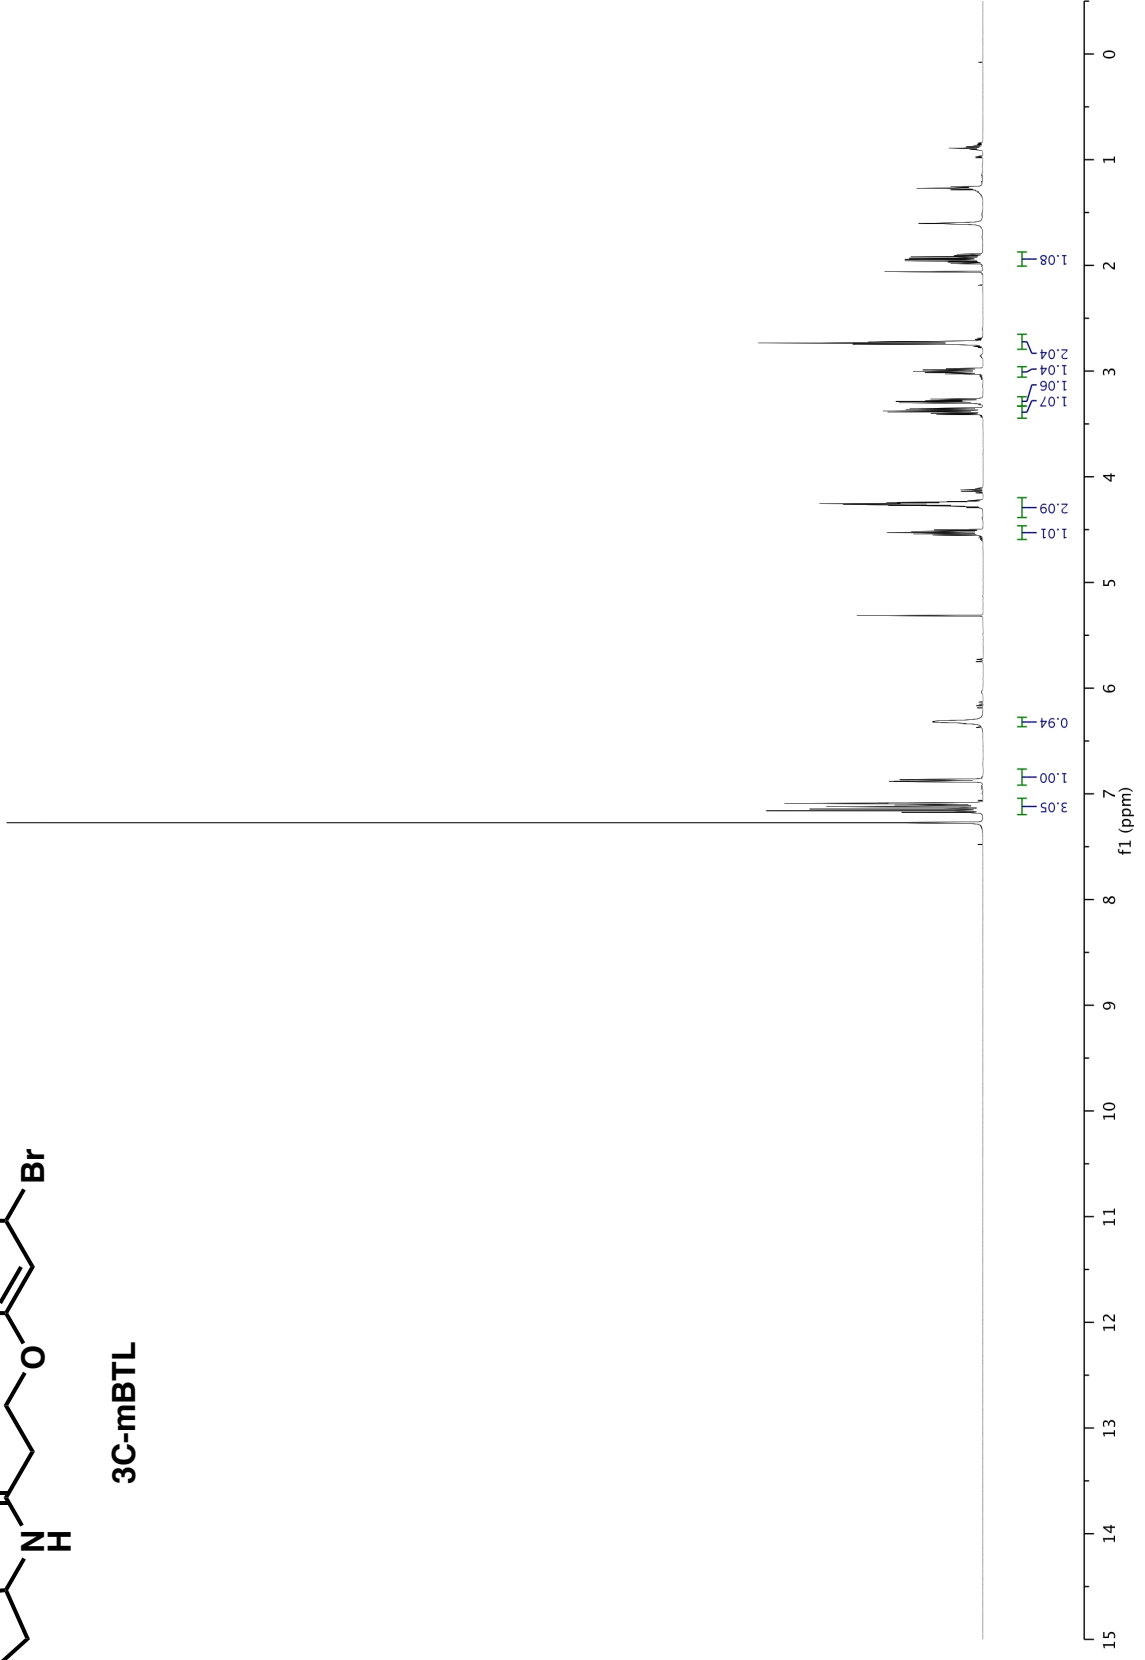

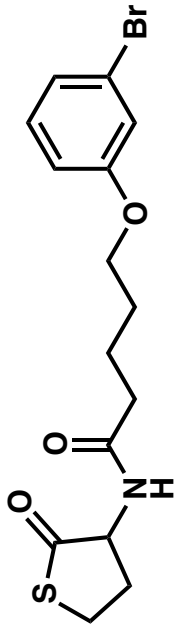

5C-mBTL

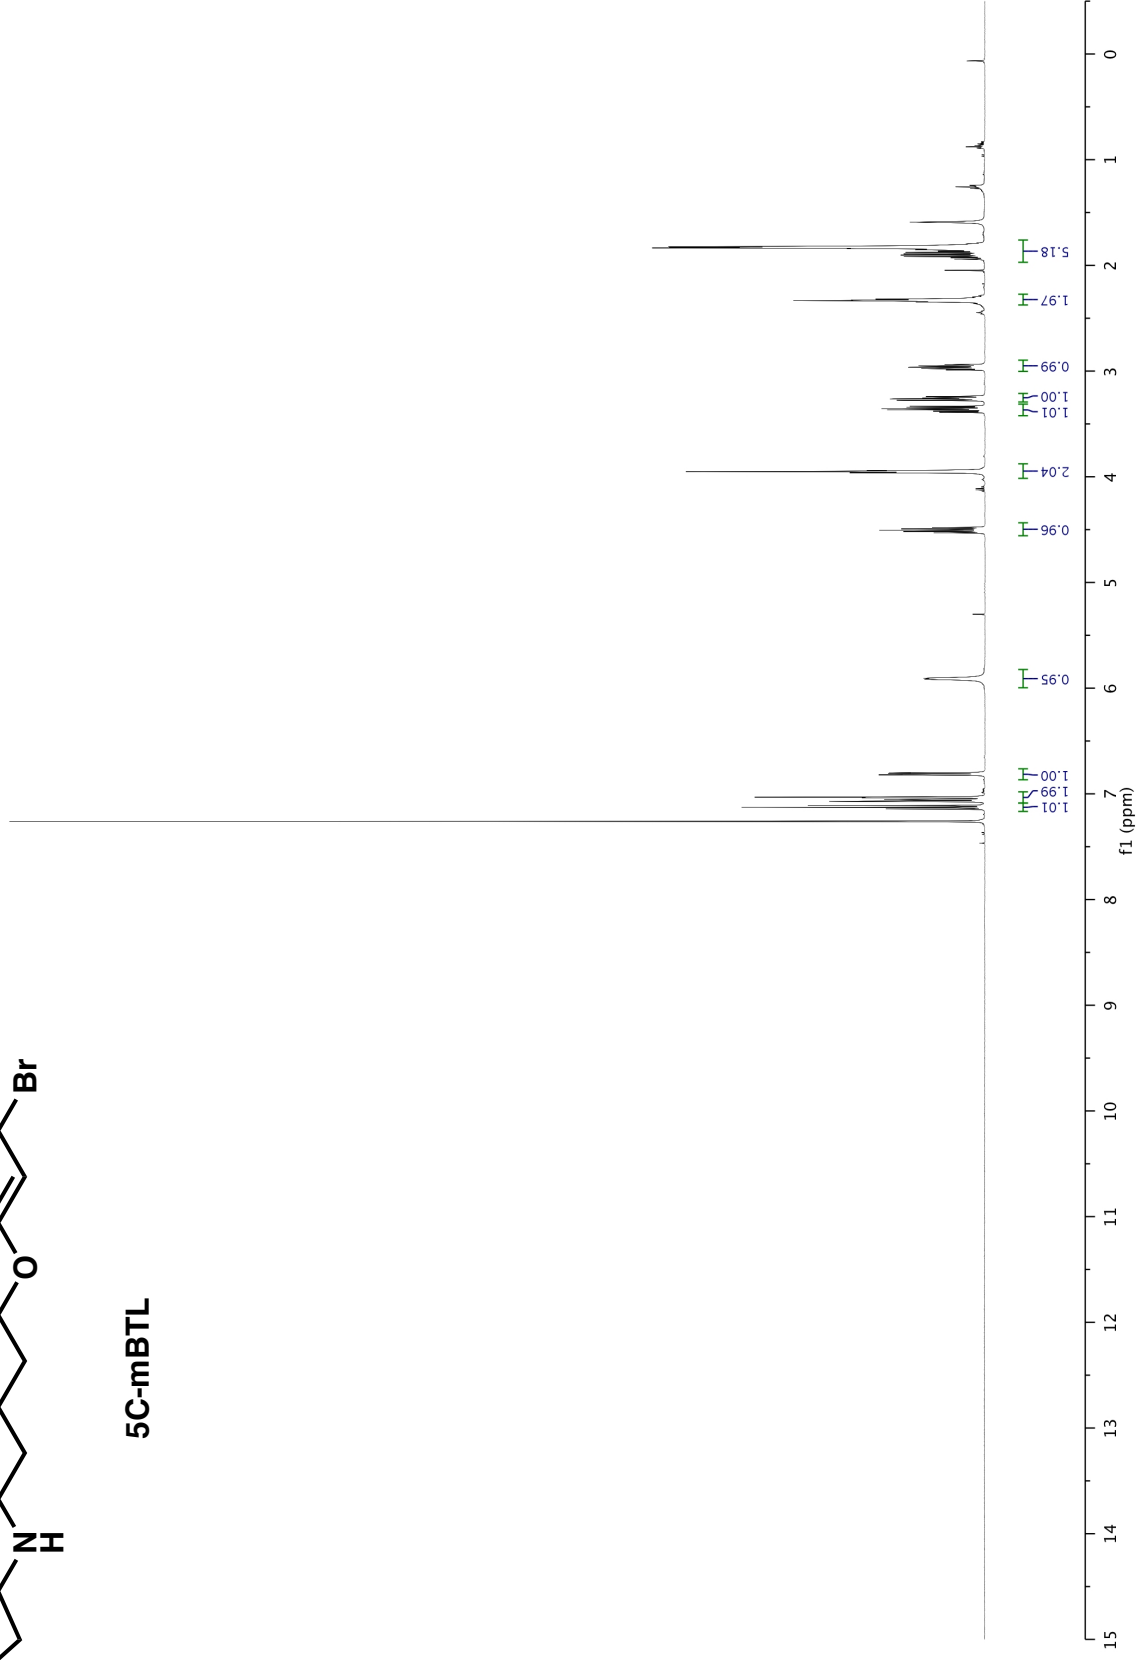

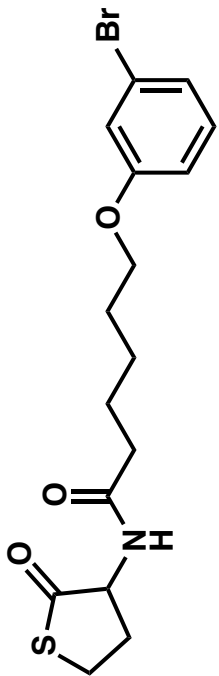

6C-mBTL

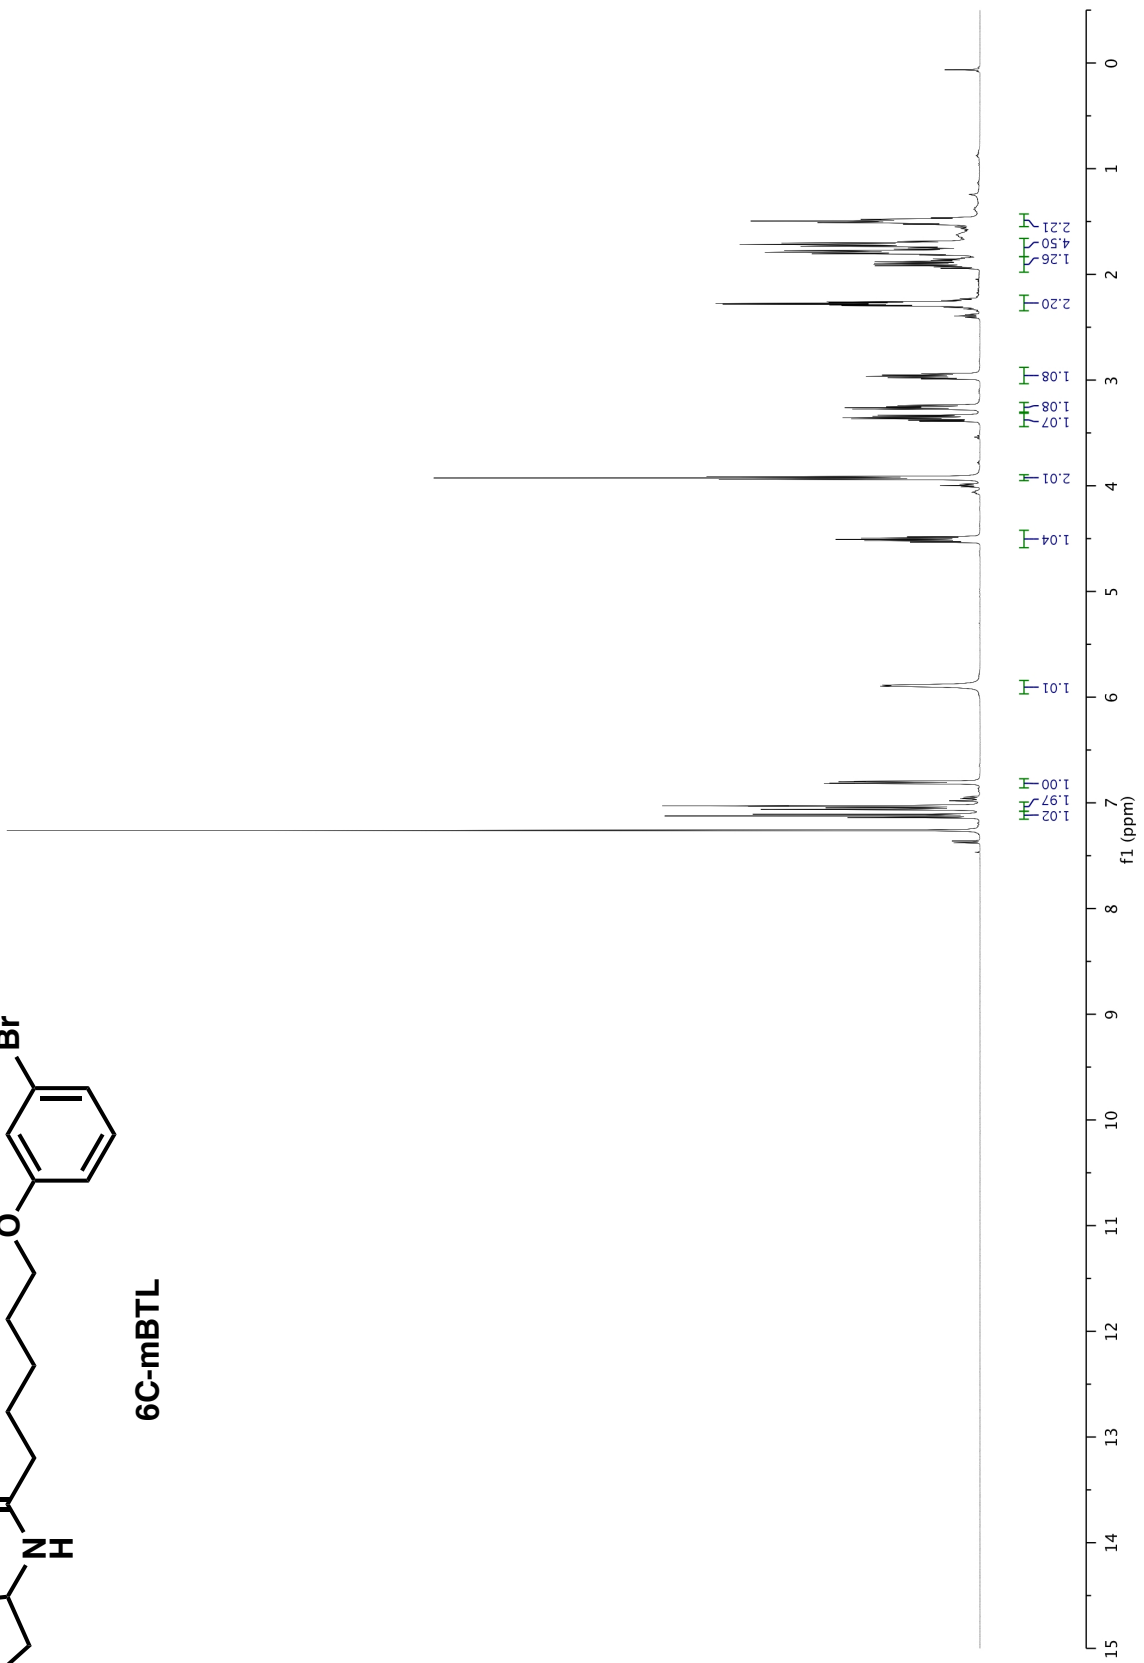

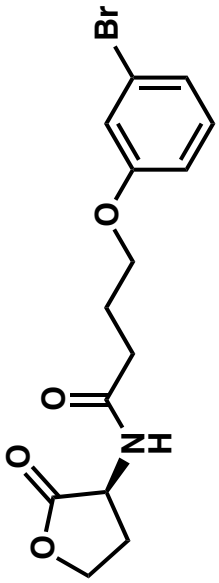

mBL

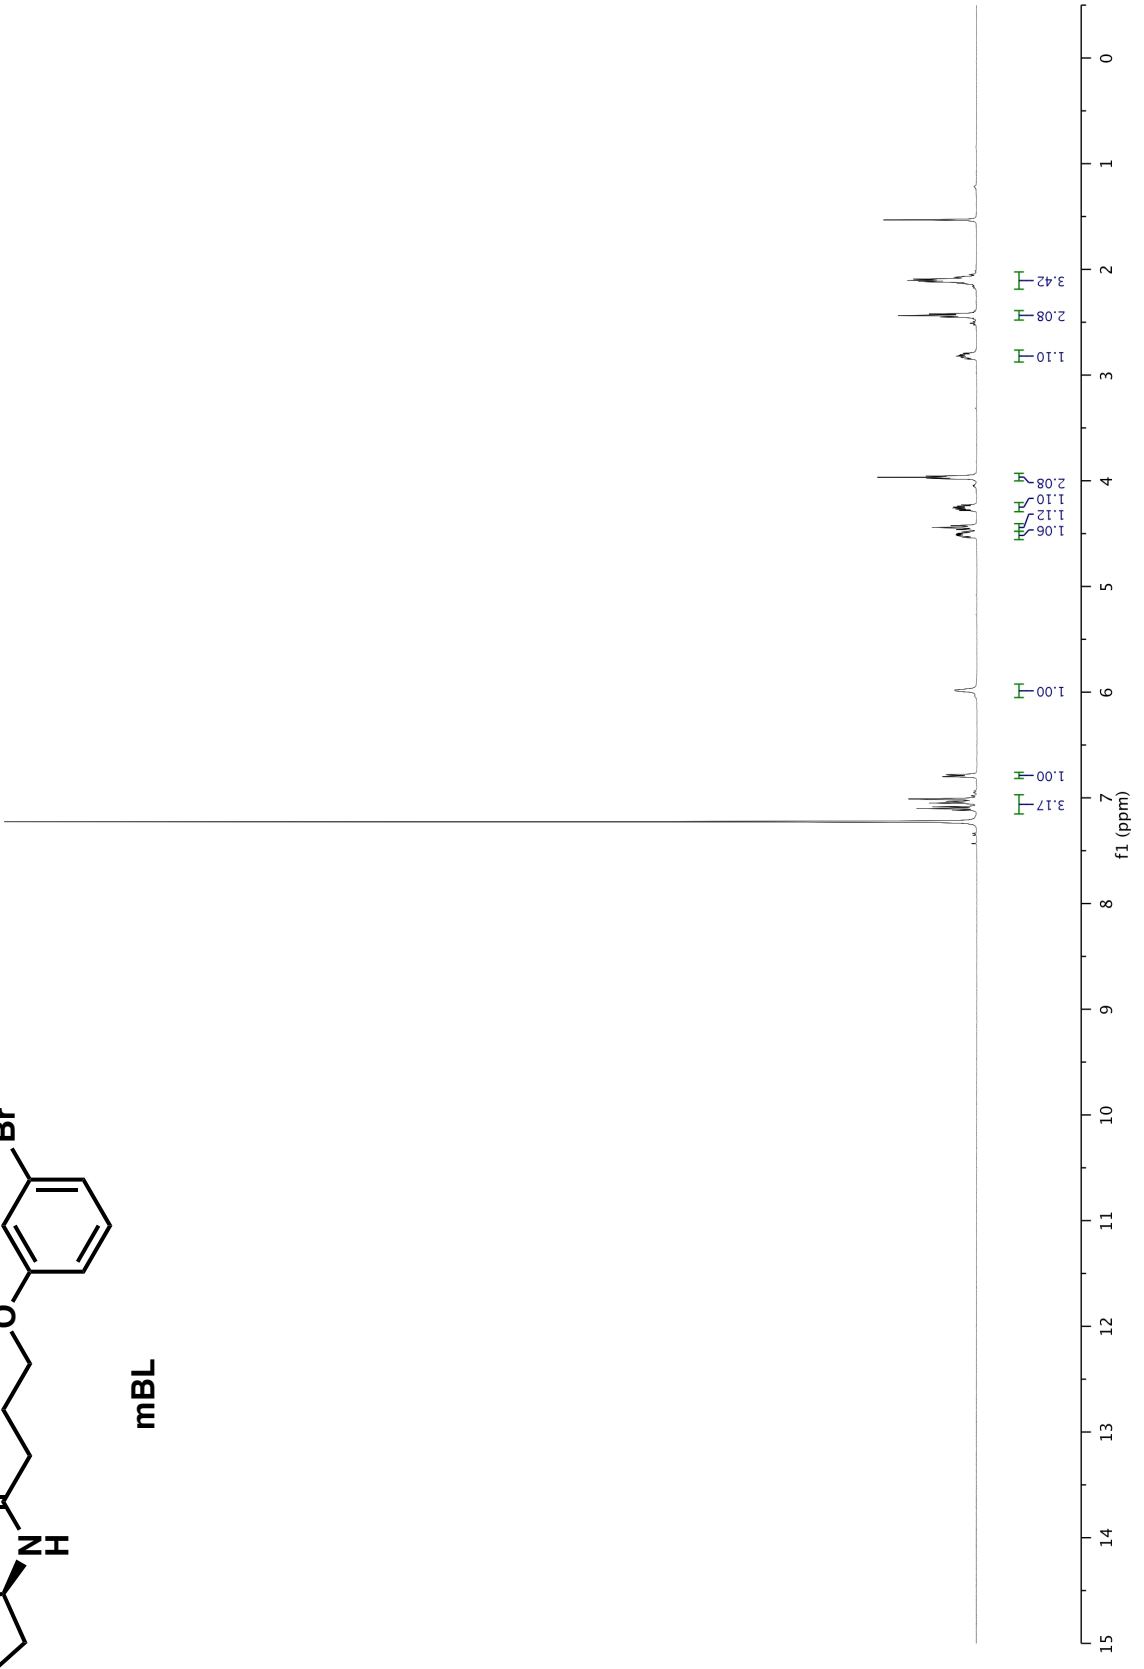

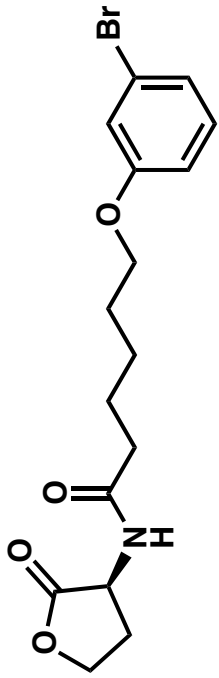

C6-mBL

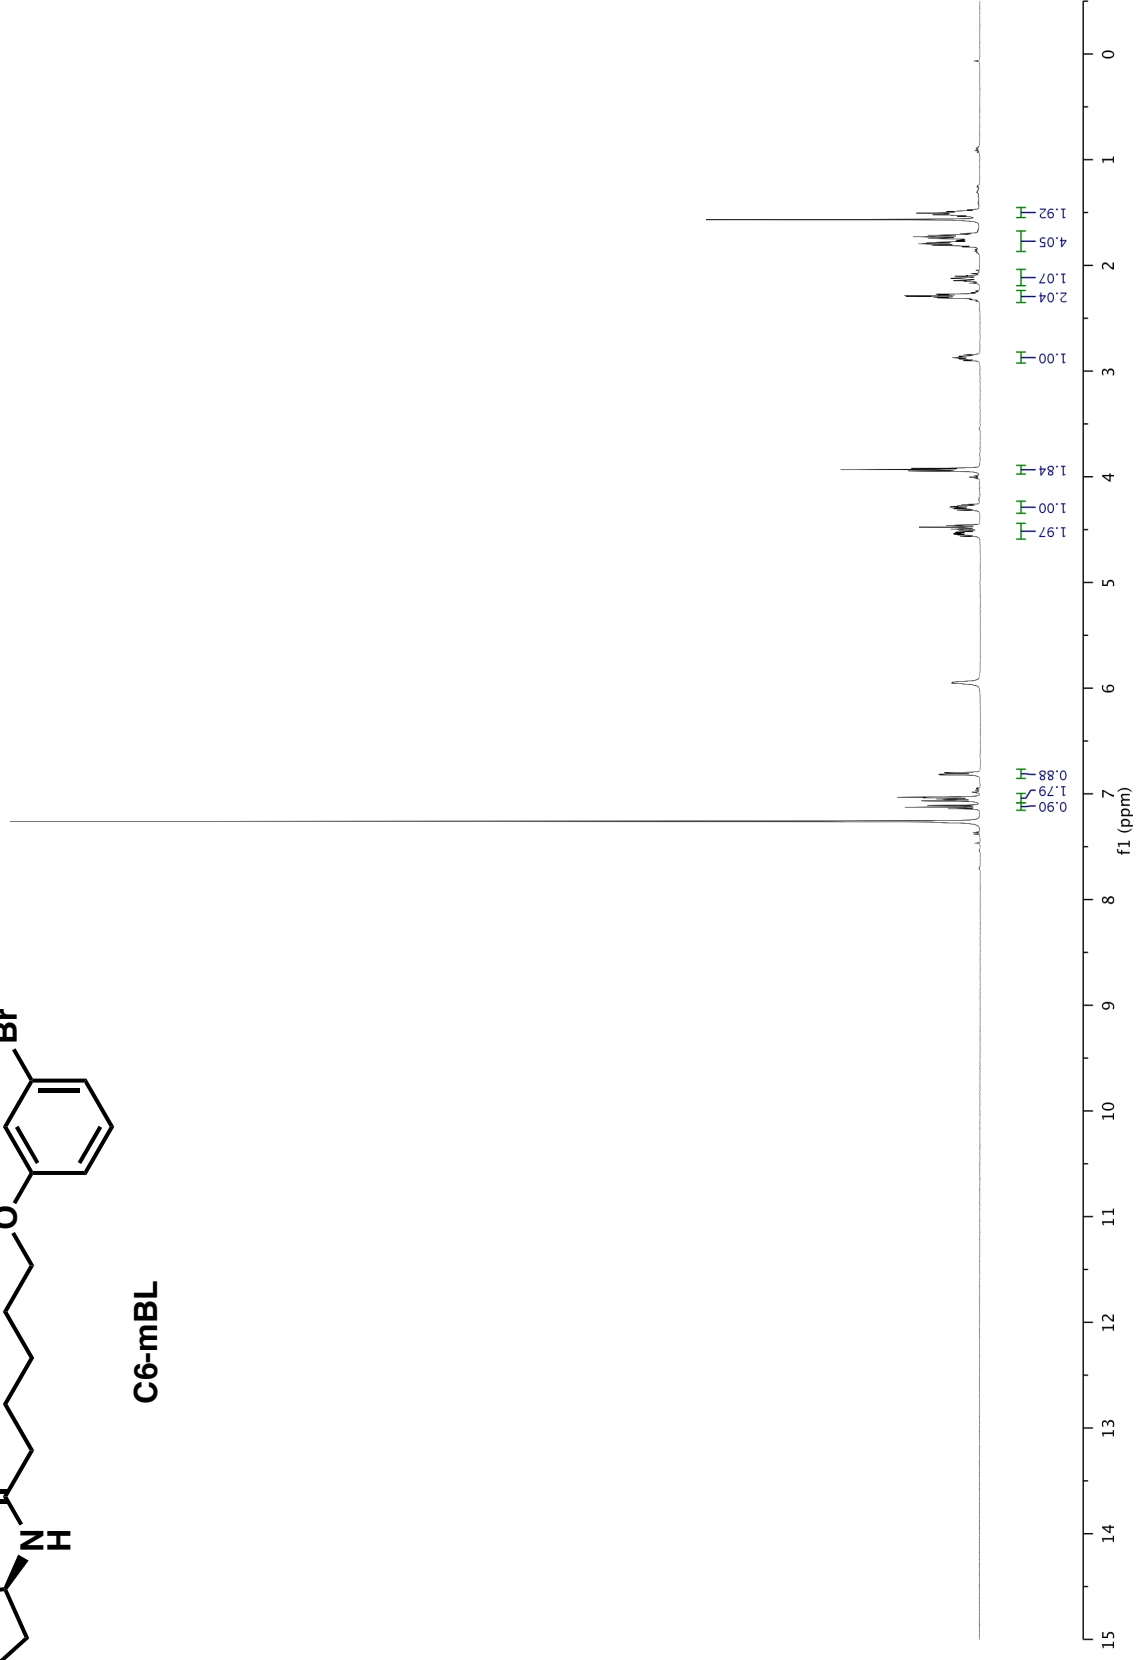

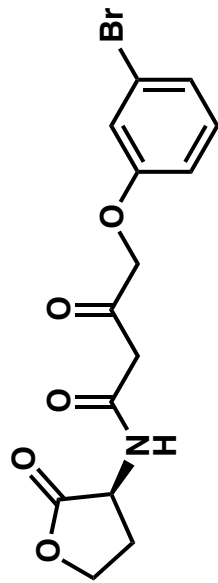

30-mBL

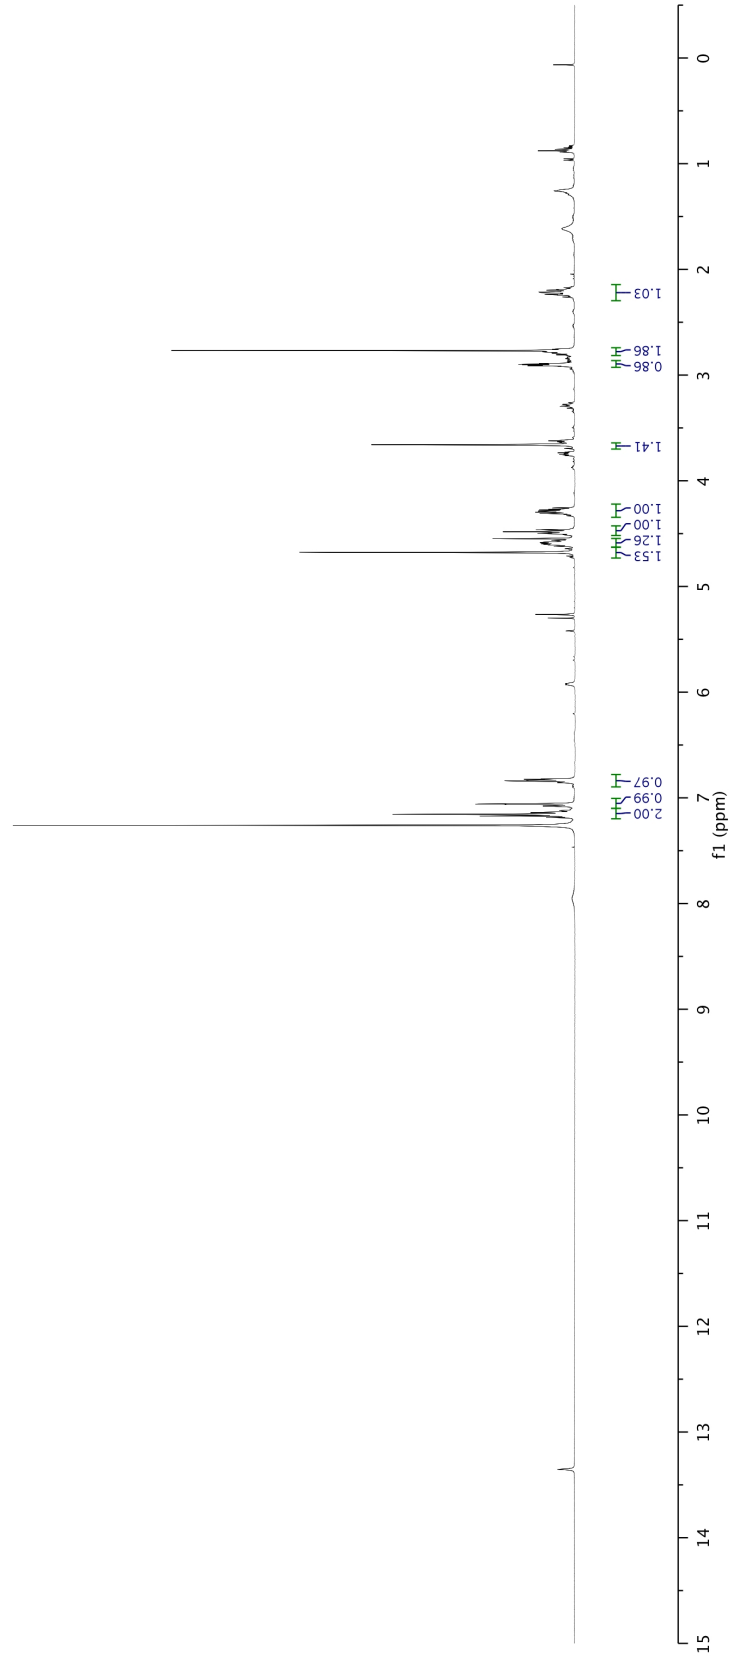

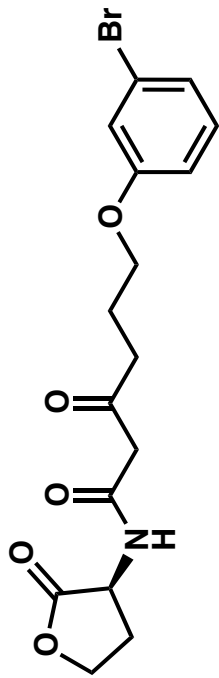

30-C6-mBL

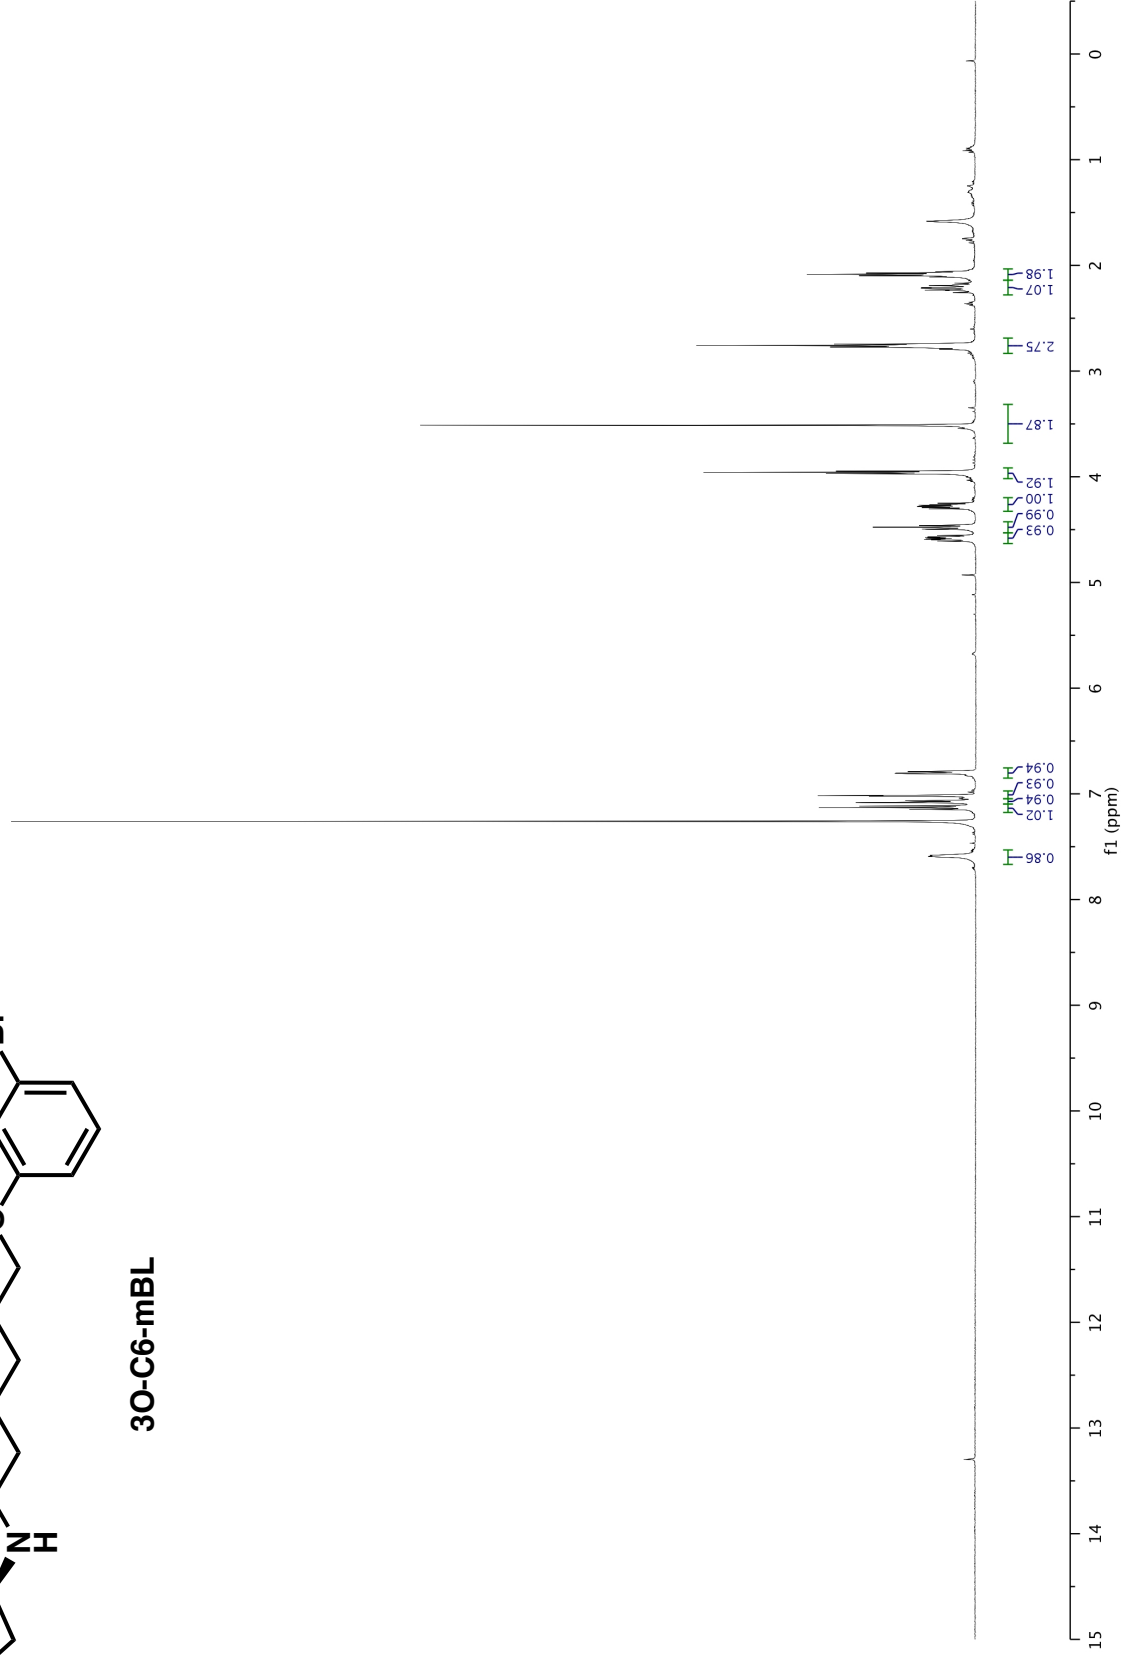

Supplement: 1316981110_sapp.pdf [file 1316981110_sapp.pdf]
